# 1 Genome sequence and characterization of five 2 bacteriophages infecting *Streptomyces coelicolor* and 3 *Streptomyces venezuelae*: Alderaan, Coruscant, 4 Dagobah, Endor1 and Endor2

5 Aël Hardy, Vikas Sharma, Larissa Keвер and Julia Frunzke\*

6 Institute of Bio- und Geosciences, IBG-1: Biotechnology, Forschungszentrum Jülich, 52425 Jülich, Germany

7 \* Correspondence: [j.frunzke@fz-juelich.de](mailto:j.frunzke@fz-juelich.de); Tel.: +49 2461 615430

8 **Abstract:** *Streptomyces* are well-known antibiotic producers, and are also  
9 characterized by a complex morphological differentiation. *Streptomyces*, like all  
10 bacteria, are confronted with the constant threat of phage predation, which in turn  
11 shapes bacterial evolution. However, despite significant sequencing efforts  
12 recently, relatively few phages infecting *Streptomyces* have been characterized  
13 compared to other genera. Here, we present the isolation and characterization of  
14 five novel *Streptomyces* phages. All five phages belong to the *Siphoviridae* family,  
15 based on their morphology as determined by transmission electron microscopy.  
16 Genome sequencing revealed that four of them were temperate phages, while one  
17 had a lytic lifestyle. Moreover, one of the newly sequenced phages shows very little  
18 homology to already described phages, highlighting the still largely untapped viral  
19 diversity. Altogether, this study expands the number of characterized phages of  
20 *Streptomyces* and sheds light on phage evolution and phage-host dynamics in  
21 *Streptomyces*.

22 **Keywords:** phage isolation; phage genomics; *Streptomyces*; *Siphoviridae*;  
23 actinobacteriophages, actinorhodin

24  
25

---

## 26 1. Introduction

27 *Streptomyces* is a genus of Gram-positive bacteria belonging to the order of  
28 Actinobacteria, and exhibit a high GC-content (on average about 73 mol% G + C).  
29 *Streptomyces* are prolific producers of natural products with a wide range of  
30 biological activities. This repertoire of bioactive molecules has been harnessed for  
31 medical and agricultural purposes, as for example 2/3 of known antibiotics of  
32 microbial origin are produced by *Streptomyces* [1-3].

33 Another distinctive feature of *Streptomyces* is their complex developmental cycle.  
34 Unlike most bacteria—that divide by binary fission, *Streptomyces* development is  
35 instead centered on the formation of spores. Germinating spores first form a network  
36 of interconnected cells, called vegetative mycelium. The vegetative mycelium later  
37 serves as a basis for the coordinated erection of an aerial mycelium. This is followed  
38 by the segmentation of these aerial filaments into spores, which can then start a new

39 cycle [3-5].

40 Phages infecting *Streptomyces* were described at a quick pace in the 1970-1980s, but  
41 most of them were not later sequenced [6-8]. The phage phiC31 represents a notable  
42 exception to this trend, as it was used to develop crucial genetic tools for *Streptomyces*  
43 before being sequenced in 1999 [9-11]. Phages R4, SV1, VP5 were also the subject of  
44 numerous studies, but the latter was not sequenced [12-13].

45 *Streptomyces* peculiarities were studied in the context of phage infection. For  
46 example, adsorption to mycelium of phage Pal6 was shown to differ depending on  
47 the stage of development of *Streptomyces albus* [14]. In this instance, phage  
48 adsorption was found to be maximal for germinating spores. Combined with the  
49 observation that germinating spores showed an intense average metabolic activity,  
50 this suggests that spore germination represents the most sensitive development  
51 stage for phage infection.

52 Conversely, the recent years have seen a sustained effort into the isolation and  
53 sequencing of *Streptomyces* phages, notably by the SEA-PHAGES (Science Education  
54 Alliance-Phage Hunters Advancing Genomics and Evolutionary Science) program  
55 in the USA (<https://seaphages.org/>) [15]. However, few of these phages were  
56 extensively characterized.

57 Here, we report the isolation, characterization and genome analysis of five novel  
58 *Streptomyces* phages. Two of them (Alderaan and Coruscant) were isolated using *S.*  
59 *venezuelae*, the remaining three (Dagobah, Endor1 and Endor2) were isolated using  
60 *S. coelicolor*. Observation with transmission electron microscopy showed that all five  
61 phages belong to the *Siphoviridae* family. Lifestyle prediction with the complete  
62 nucleotide sequences revealed that four (Alderaan, Dagobah, Endor1 and Endor2)  
63 are temperate, while Coruscant is thought to be a lytic phage. Alderaan, Coruscant,  
64 Endor1 and Endor2 show close relatedness to already described *Streptomyces* phages  
65 – Endor1 and Endor2 being highly homologous to each other. In contrast, Dagobah  
66 showed very little relatedness to any sequenced phage, highlighting the still  
67 massively untapped viral diversity.

## 68 **2. Materials and Methods**

### 69 *2.1 Bacterial strains and growth conditions*

70 *Streptomyces venezuelae* ATCC 10712 [16] and *Streptomyces coelicolor* M600 [17]  
71 and strain M145 [18] were used as main host strains in this study. Cultures were  
72 started by inoculating spores from spore stocks stored in 20% glycerol at -20°C [19].  
73 *S. venezuelae* was grown in liquid Glucose Yeast Malt extract (GYM) medium, while  
74 *S. coelicolor* was grown in liquid Yeast Extract Malt Extract (YEME) medium. Unless  
75 otherwise stated, cultivation was carried out at 30°C. For double agar overlays, GYM  
76 agar was used for both species, with 0.5% and 1.5% agar for the top and bottom  
77 layers, respectively.

78

### 79 *2.2 Phage isolation and propagation*

80 Phages were isolated from soil samples taken near the Forschungszentrum  
81 Jülich (Germany). Phages contained in soil samples were resuspended by incubation  
82 in sodium chloride/magnesium sulfate (SM) buffer (10 mM Tris-HCl pH 7.3, 100 mM  
83 NaCl, 10 mM MgSO<sub>4</sub>, 2mM CaCl<sub>2</sub>) for 2 hours. The samples were centrifuged at  
84 5,000 × g for 10 min to remove solid impurities. The supernatants were filtered  
85 through a 0.22-µm pore-size membrane filter to remove bacteria. For each sample, 1  
86 ml of filtered supernatant was mixed with 3 ml of liquid medium inoculated with  
87 10<sup>7</sup> *Streptomyces* spores.

88 After overnight incubation, the culture supernatant was collected by  
89 centrifugation at 5,000 × g for 10 min and filtered through a 0.22-µm pore-size  
90 membrane filter. Serial dilutions of the filtrate were then spotted on a bacterial lawn  
91 propagated by mixing 200 µl of *Streptomyces* overnight culture with 4 ml top agar,  
92 according to a modified version of the double agar overlay method [20]. Plaques  
93 were visualized after overnight incubation at 30°C.

94 Purification of the phage samples was carried out by restreaking single plaques  
95 twice [20]. Phage amplification was achieved by mixing 100 µl of the purified phage  
96 lysate into top agar to obtain confluent lysis on the plate. After overnight incubation,  
97 5 ml of SM buffer were used to soak the plates and resuspend phages. The resulting  
98 phage lysate was centrifuged, and the supernatant was filtered to obtain the high-  
99 titer phage solution used for downstream processes.

100 To assess presence of actinorhodin, the plates were inverted and exposed to  
101 ammonia fumes for 15 min by placing 5 ml of 20% ammonium hydroxide solution  
102 on the inner surface of the lid.

103

#### 104 2.3 Electron microscopy observation of phage virions

105 For electron microscopy, 5 µl of purified phage suspension were deposited on a  
106 glow-discharged formvar carbon-coated nickel grids (200 mesh; Maxtaform; Plano,  
107 Wetzlar, Germany) and stained with 0.5% (wt/vol) uranyl acetate. After air drying,  
108 the sample was observed with a TEM LEO 906 (Carl Zeiss, Oberkochen, Germany)  
109 at an acceleration voltage of 60 kV.

110

#### 111 2.4 Phage infection curves

112 Infection in shake flasks (*S. venezuelae* phages): 70 ml GYM medium were  
113 inoculated with 10<sup>5</sup> spores and incubated at 30°C for 6-8 hours to allow spore  
114 germination. Phages were then added at the corresponding multiplicity of infection  
115 (MOI). OD<sub>450</sub> was measured over time to assess bacterial growth. In parallel, the  
116 filtered supernatants of the cultures were collected at the same time points. 3 µl of  
117 these supernatants were spotted on a *Streptomyces venezuelae* lawn (inoculated to an  
118 OD<sub>450</sub>=0.4) at the end of the experiment to estimate the phage titer.

119 Infection in microtiter plates (*S. coelicolor* phages): Growth experiments were  
120 performed in the BioLector® microcultivation system of m2p-labs (Aachen,  
121 Germany). Cultivation was performed as biological triplicates in 48-well

122 FlowerPlates (m2plabs, Germany) at 30 °C and a shaking frequency of 1200 rpm [21].  
123 Backscatter was measured by scattered light with an excitation wavelength of 620  
124 nm (filter module:  $\lambda_{Ex}/\lambda_{Em}$ : 620 nm/ 620 nm, gain: 25) every 15 minutes. Each well  
125 contained 1 ml YEME medium and was inoculated with  $10^6$  spores of *S. coelicolor*  
126 M145. Phages were added after 7 h, and sampling was performed at the indicated  
127 time points. Subsequently, 2  $\mu$ l of the supernatants were spotted on a lawn of *S.*  
128 *coelicolor* propagated on a double overlay of GYM agar inoculated at an initial  
129  $OD_{450}=0.4$ .  
130

### 131 2.5 Host range determination

132 The host range of our phages was determined for the following *Streptomyces*  
133 species: *S. rimosus* (DSM 40260), *S. scabiei* (DSM 41658), *S. griseus* (DSM 40236), *S.*  
134 *platensis* (DSM 40041), *S. xanthochromogenes* (DSM 40111), *S. mirabilis* (DSM 40553),  
135 *S. lividans* TK24 [22], *S. olivaceus* (DSM 41536) and *S. cyaneofuscatus* (DSM 40148). The  
136 different *Streptomyces* species were grown in GYM medium, to which glass beads  
137 were added to favor dispersed growth.

138 The host range was determined by spotting serial dilutions of phage solution on  
139 lawns of the different *Streptomyces* species, in duplicates. A species was considered  
140 sensitive to a given phage only if single plaques could be detected; we further  
141 indicated if the phages are able to lyse a species (Table 1).

### 142 2.6 DNA isolation

143 For isolation of phage DNA, 1  $\mu$ l of 20 mg/ml RNase A and 1 U/ $\mu$ l DNase  
144 (Invitrogen) were added to 1 ml of the filtered lysates to limit contamination by host  
145 nucleic acids. The suspension was incubated at 37 °C for 30 min. Then, EDTA,  
146 proteinase K and SDS were added to the mixture at final concentrations of 50 mM  
147 (EDTA and proteinase K) and 1% SDS (w/v), respectively. The digestion mixture  
148 was incubated for 1 h at 56°C, before adding 250  $\mu$ l of  
149 phenol:chloroform:isopropanol. The content was thoroughly mixed before  
150 centrifugation at 16,000 x g for 4 min.

151 The upper phase containing the DNA was carefully transferred to a clean  
152 microcentrifuge tube and 2 volumes of 100% ethanol were added as well as sodium  
153 acetate to a final concentration of 0.3 M. After centrifugation at 16,000 x g for 10 min,  
154 the supernatant was discarded, and the pellet washed with 1 ml 70% ethanol.  
155 Finally, the dried pellet was resuspended in 3  $\mu$ l DNase-free water and stored at  
156 4°C until analyzed.

157

158

159

### 160 2.7 DNA sequencing and genome assembly

161 The DNA library was prepared using the NEBNext Ultra II DNA Library Prep  
162 Kit for Illumina according to the manufacturer's instructions and shotgun-

163 sequenced using the Illumina MiSeq platform with a read length of 2 x 150bp  
164 (Illumina). In total, 100,000 reads were subsampled for each phage sample, and *de*  
165 *novo* assembly was performed with Newbler (GS De novo assembler; 454 Life  
166 Sciences, Brandford, USA). Finally, contigs were manually curated with Consed  
167 version 29.0 [23].

168

#### 169 *2.8 Gene prediction and functional annotation*

170 Open reading frames (ORFs) in the phage genomes were identified with  
171 Prodigal v2.6.3 [24] and functionally annotated using an automatic pipeline using  
172 Prokka 1.11 [25]. The functional annotation was automatically improved and  
173 curated with hidden Markov models (HMMs), and Blastp [26] searches against  
174 different databases (Prokaryotic Virus Orthologous Groups (pVOGs)[27], viral  
175 proteins and Conserved Domain Database CDD [28]), with the e-value cutoff  $10^{-10}$ .

176 The annotated genomes were deposited in GenBank under the following  
177 accession numbers: MT711975 (Alderaan), MT711976 (Coruscant), MT711977  
178 (Dagobah), MT711978 (Endor1) and MT711979 (Endor2).

179 The ends of the phage genomes were determined with PhageTerm [29] using  
180 default parameters. Phage lifecycle was predicted with PhageAI [30] using default  
181 parameters.

182

#### 183 *2.9 Genome comparison and classification*

184 To classify the unknown phage genomes at nucleotide level, 31 complete  
185 reference actinophage genomes belong to different known clusters were  
186 downloaded from the Actinobacteriophage Database [31]. The pairwise average  
187 nucleotide identity (ANI) were calculated with the five unknown *Streptomyces*  
188 phages including 31 reference genomes using the python program pyani 0.2.9 [32]  
189 with ANIb method. The output average percentage identity matrix file generated  
190 from pyani was used for clustering and displayed using the ComplexHeatmap  
191 package in R [33]. Phage genome map with functional annotation was displayed  
192 using the gggenes package in R.

#### 193 *2.10 Protein domain-based classification*

194 An alternative approach was used to classify newly sequenced phages based on  
195 conserved protein domains [28]. RPS-BLAST (Reverse PSI-BLAST) searches were  
196 performed with e-value cutoff 0.001 against the Conserved Domain Database [28]  
197 using the 2486 complete reference actinophages [31], including the newly sequenced  
198 phage genomes. Identified Pfam protein domains output files from each phage  
199 genome were merged and converted into a numerical presence-absence matrix. The  
200 hierarchical clustering dendrogram was constructed with the help of the ward.2  
201 method using the R platform. The resulting dendrogram was visualized using  
202 ggtree [34].

203



204 **3. Results**

205 *3.1 Phage isolation and virion morphology*

206 Five novel phages infecting *Streptomyces* were isolated from soil samples close  
207 to the Forschungszentrum Jülich, Germany. The phages Alderaan and Coruscant  
208 were isolated using *Streptomyces venezuelae* ATCC 10712 and formed small,  
209 transparent and round plaques of approximately 2 mm of diameter (Figure 1A).

210 The phages Dagobah, Endor1 and Endor2 were isolated using *Streptomyces*  
211 *coelicolor* M600 as a host strain. Dagobah's plaques were very small (<1 mm) and  
212 were completely formed only after 2 days of incubation. Endor1 and Endor2 formed  
213 plaques of 2 mm in diameter with a distinct turbid zone in the center. Additionally,  
214 colored halos circling the plaques appeared after 3 days of incubation (Figure 1B).  
215 These halos were mostly brownish in the case of Dagobah, and reddish for Endor1  
216 and Endor2. Exposure to ammonia fume resulted in a pronounced blue coloration  
217 around plaques, confirming that the halos surrounding plaques contained  
218 actinorhodin (Figure S1) [35].

219 TEM observation of the phage particles revealed that all five phages exhibit an  
220 icosahedral capsid and a non-contractile tail (Figure 1C). Based on the morphology,  
221 the phages were classified as members of the *Siphoviridae* family.

222

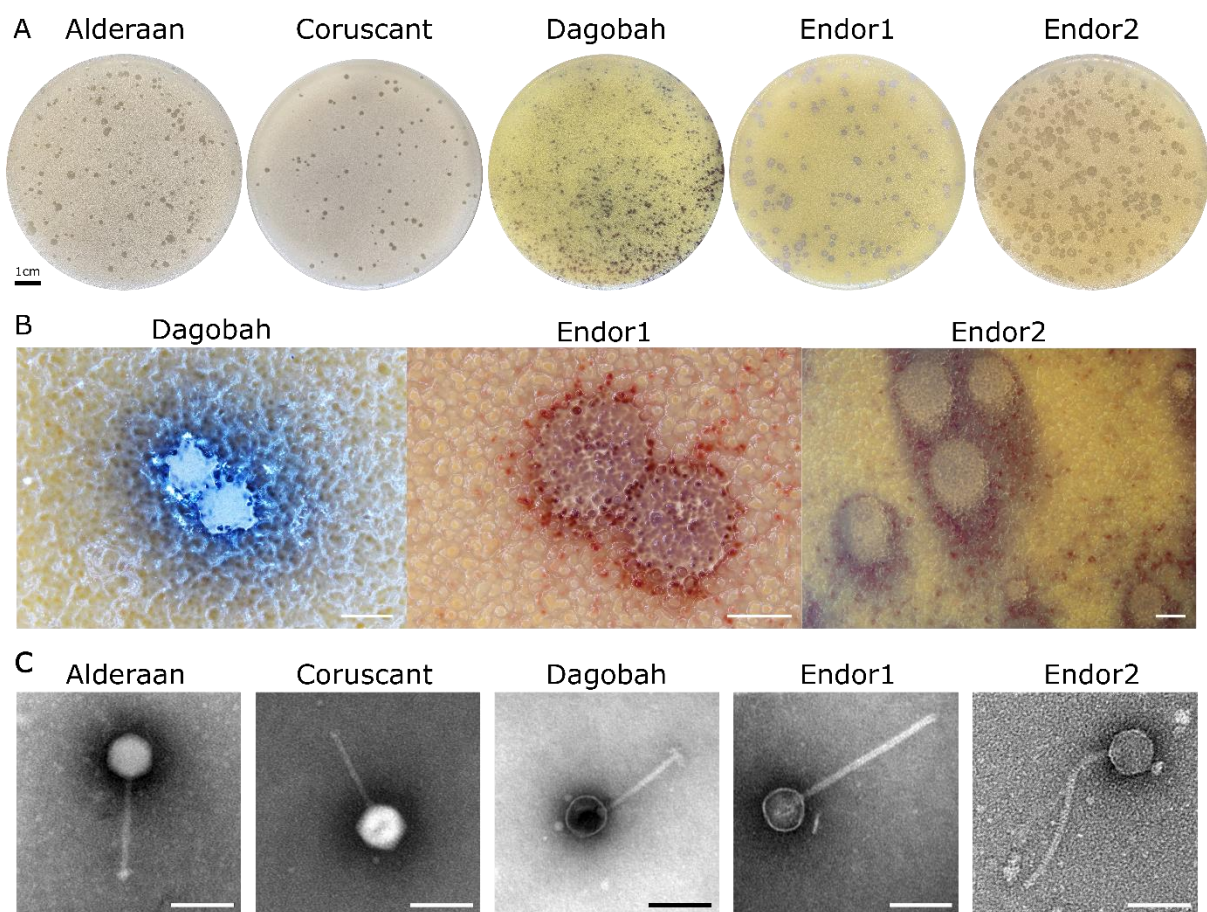

223

224

225

**Figure 1. Morphology observation of five novel *Streptomyces* phages.** (a) Plaque morphologies of the five phages. Double agar overlays were performed to infect *S. venezuelae* ATCC 10712 with the

226 phages Alderaan and Coruscant, and *S. coelicolor* M600 with the phages Dagobah, Endor1 and Endor2.  
227 Plates were incubated overnight at 30°C and another day (3 days in the case of Dagobah) at room  
228 temperature to reach full maturity of the bacterial lawn; (b) Close-ups of phage plaques imaged using  
229 a stereomicroscope Nikon SMZ18. *S. coelicolor* M145 was infected by phages using GYM double agar  
230 overlays. The plates were incubated at 30°C overnight and then kept at room temperature for two  
231 (Endor1 and Endor2) or three days (Dagobah). Scale bar: 1 mm; (c) Transmission electron microscopy  
232 (TEM) of phage isolates. The phage virions were stained with uranyl acetate. Scale bar: 150 nm.

### 233 3.2 Infection curves and host-range determination

234 Phage infection in liquid cultures was performed to assess infection dynamics.  
235 Due to the complex developmental cycle of *Streptomyces*, standard one-step growth  
236 curves could not be performed. We instead inoculated liquid cultures with spores of  
237 *Streptomyces* and let them germinate for approximately 7 h before adding the phages  
238 to a multiplicity-of-infection (MOI) from 0.1 to 10. For the *S. venezuelae* phages,  
239 infection was performed in flasks and OD<sub>450</sub> was used to estimate cell density. In  
240 contrast, *S. coelicolor* was cultivated in microtiter plates, and cell growth was  
241 monitored using continuous backscatter measurements. In both cases, phage titer  
242 was measured over time to estimate the production of phage progeny.

243 Infection of *S. venezuelae* with Alderaan and Coruscant showed moderate lysis  
244 for MOI 1, and distinct OD drops for the MOI 10, which was reduced to almost zero  
245 after 24 h of infection (Figure 2A). Phage titers showed a significant increase after 16  
246 h of infection and were markedly higher for MOI 10 than MOI 1.

247 As for the *S. coelicolor* phages (Figure 2B), infection with Dagobah caused a mild  
248 growth delay, visible especially for the highest MOI (MOI 1). In parallel, the phage  
249 titers grew moderately (10<sup>2</sup>-fold increase between 0 and 48 h) or strongly (10<sup>5</sup>-fold  
250 increase between 0 and 48 h) for initially low (MOI 0.05) or high (MOI 1) MOIs,  
251 respectively. In contrast, infection with Endor1 had a profound effect on bacterial  
252 growth, as the highest MOIs (MOI 0.1 and 1) effectively suppressed growth. The  
253 phage titers showed concordant behavior, with a strong increase from 16 hours and  
254 a titer plateauing at a high level for MOI 0.1. Endor2 showed an intermediate effect:  
255 the growth curves were significantly shifted, proportionally to the initial MOIs. At  
256 low MOIs, the evolution of Endor1/2 titer was bell-shaped, with an initial increase  
257 until 40 hours followed by a decline down to a virtually null titer at the end of the  
258 experiment.

259 Furthermore, the backscatter started to decrease in the uninfected wells starting  
260 from 50h, coinciding with the start of the production of blue-pigmented  
261 actinorhodin. A similar drop was also observed in the samples infected with  
262 Dagobah, Endor1 and the lowest MOI of Endor2.

263



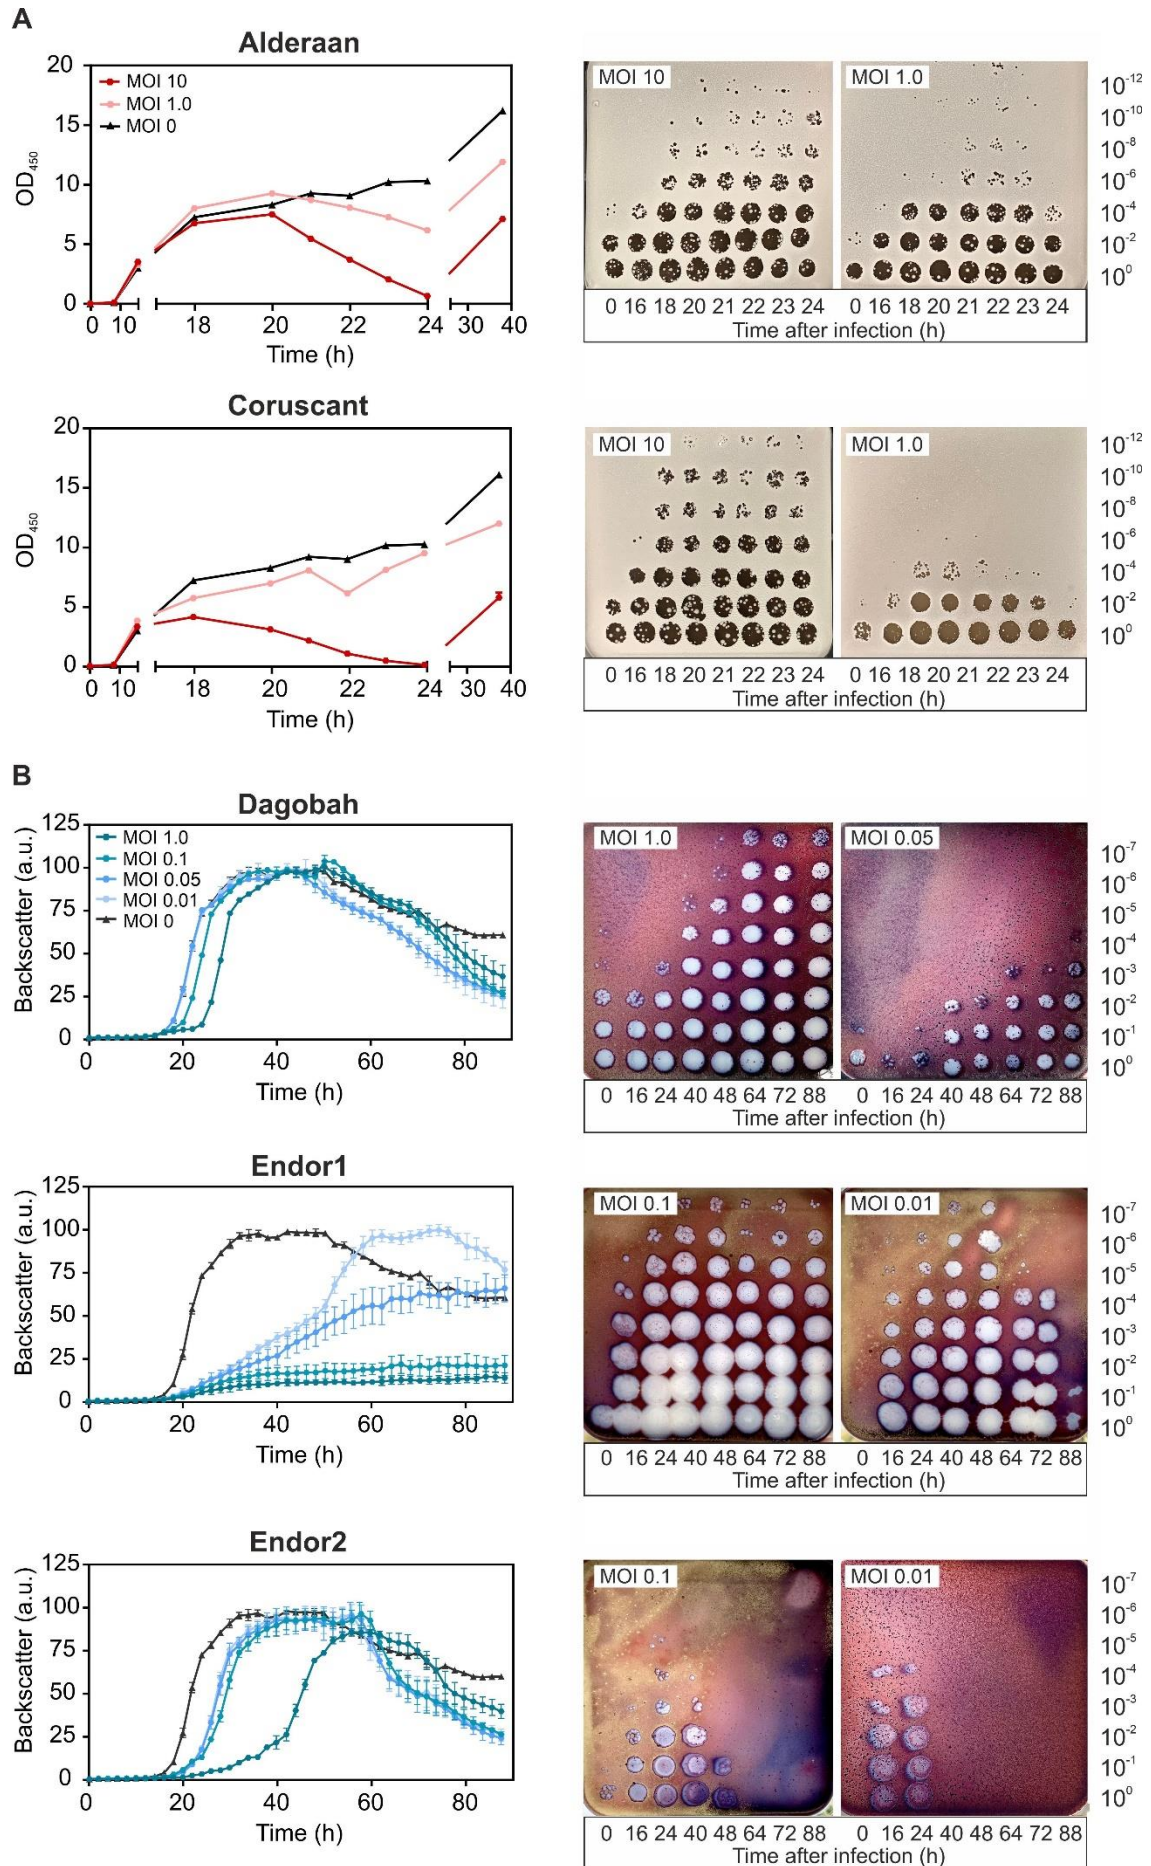



265 **Figure 2. Infection curves of the five phages infecting *S. venezuelae* (a) and *S. coelicolor* (b).** Spores  
 266 of either *S. venezuelae* ( $10^5$ ) or *S. coelicolor* M145 ( $10^6$ ) were grown in GYM or YEME medium,  
 267 respectively. After 6 to 8 hours, phages were added at the corresponding multiplicity of infection  
 268 (MOI). OD<sub>450</sub> or backscatter were measured over time (left panels), in parallel to phage titers (right  
 269 panels).

270

271 **Table 1.** The host range of the five phages was assessed by spotting serial dilutions of these phages  
 272 on lawns of different *Streptomyces* species propagated on GYM medium. The outcome of the spot  
 273 assays is reported as follows: hosts used for phage isolation (grey), plaque formation (green),  
 274 clearance of the bacterial lawn without visible plaques (yellow).

|                                  | <b>Alderaan</b> | <b>Coruscant</b> | <b>Dagobah</b> | <b>Endor1</b> | <b>Endor2</b> |
|----------------------------------|-----------------|------------------|----------------|---------------|---------------|
| <i>S. venezuelae</i>             |                 |                  |                |               |               |
| <i>S. coelicolor</i> M600        |                 |                  |                |               |               |
| <i>S. coelicolor</i> M145        |                 |                  |                |               |               |
| <i>S. rimosus subsp. rimosus</i> |                 |                  |                |               |               |
| <i>S. scabiei</i>                |                 |                  |                |               |               |
| <i>S. griseus</i>                |                 |                  |                |               |               |
| <i>S. platensis</i>              |                 |                  |                |               |               |
| <i>S. xanthochromogenes</i>      |                 |                  |                |               |               |
| <i>S. lividans</i>               |                 |                  |                |               |               |
| <i>S. olivaceus</i>              |                 |                  |                |               |               |
| <i>S. cyaneofuscatus</i>         |                 |                  |                |               |               |

275

276 While phages usually have a relatively narrow host range, some phages can  
 277 sometimes infect many strains of the same species and even distinct species. We  
 278 assessed the host-range of our phages by spotting them on lawns of different  
 279 *Streptomyces* species (Table 1).

280 Interestingly, Endor1 and Endor2—but not Dagobah—formed plaques on *S.*  
 281 *venezuelae*. *S. coelicolor* M145 showed the same sensitivity pattern than the M600  
 282 strain. M145 and M600 are both plasmid-free derivatives of A3(2) and mainly differ  
 283 from each other in the length of their direct terminal repeats [17].

284 Beside *S. venezuelae* and *S. coelicolor*, *S. lividans* showed plaque formation by  
 285 phage Dagobah. Endor1 and Endor2 also formed plaques on *S. olivaceus* and *S.*  
 286 *cyaneofuscatus*. Alderaan, Endor1 and Endor2 caused indefinite clearance of the  
 287 bacterial lawn of several species, but higher dilutions did not reveal distinct, single  
 288 plaques. For these species, the phage lysates could have inhibitory effects on growth  
 289 or cause non-productive infection [36–37]. In summary, Endor1 and Endor2 showed  
 290 the broadest host range, but overall, the five phages we isolated feature a relatively  
 291 modest host range as they are only able to infect few other *Streptomyces* species.

292 3.3 Genome sequencing and genome features

293 All phages were sequenced using short-read technology (Illumina Mi-Seq). Each  
 294 genome could be assembled to a single contig, to which >80% of the reads could be  
 295 mapped confirming the purity of the samples.

296 The genome features of the five phages are summed up in Table 2. Briefly, they  
 297 show diverse genome sizes (39 to 133 kb), GC-contents (48 to 72%) and ORFs  
 298 numbers (51 to 290). The phage Coruscant differed from other phages, in that its  
 299 genome is significantly larger than the other phages and exhibits a markedly low  
 300 GC content (48%), in comparison to the one of its host (72%). The genomic ends were  
 301 predicted using PhageTerm, which detects biases in the number of reads to  
 302 determine DNA termini and phage packaging mechanisms [29]. Alderaan, Endor1  
 303 and Endor2 showed a headful packaging mechanism where the phage genomes  
 304 have a fixed start at the *pac* site, but the end of the genome is variable. In contrast,  
 305 phages Coruscant and Dagobah have direct terminal repeats (DTR). These DTR were  
 306 identified in the initial assembly by an approximately 2-fold increase in coverage  
 307 clearly delimited at single base positions. Phage lifecycle was predicted using  
 308 PhageAI, which developed a lifecycle classifier based on machine learning and  
 309 natural language processing [30].  
 310

311 **Table 2. Basic genome features of the five phages.** Open reading frames (ORFs) were predicted using  
 312 Prokka [25] and were later manually curated. Protein domains encoded in ORFs were identified using  
 313 RPS-BLAST against the Conserved Domain Database (CDD). The type of genome ends was  
 314 determined using Phage Term [29]. The lifestyle of each phage was predicted by the machine-learning  
 315 based program PhageAI [30].

| Phage name | Accession number | Reference host                            | Genome size (kb) | GC content (%) | ORF number | Genome termini class   | Lifestyle prediction |
|------------|------------------|-------------------------------------------|------------------|----------------|------------|------------------------|----------------------|
| Alderaan   | MT711975         | <i>Streptomyces venezuelae</i> ATCC 10712 | 39               | 72.1           | 51         | Headful ( <i>pac</i> ) | Temperate            |
| Coruscant  | MT711976         | <i>Streptomyces venezuelae</i> ATCC 10712 | 133 (12kb DTR)   | 48.4           | 290        | DTR (long)             | Virulent             |
| Dagobah    | MT711977         | <i>Streptomyces coelicolor</i> M600       | 47 kb (1kb DTR)  | 68.9           | 93         | DTR (short)            | Temperate            |
| Endor1     | MT711978         | <i>Streptomyces coelicolor</i> M600       | 49               | 65.8           | 75         | Headful ( <i>pac</i> ) | Temperate            |
| Endor2     | MT711979         | <i>Streptomyces coelicolor</i> M600       | 48               | 65.1           | 75         | Headful ( <i>pac</i> ) | Temperate            |

316

317 Phage genes involved in the same function are usually clustered together,  
 318 forming functional modules (Figure 3) [38–39]. These modules fulfil the basic  
 319 functions necessary for production of progeny phages, including DNA/RNA  
 320 metabolism, DNA replication and repair, DNA packaging, virion structure and

321 assembly (tail and capsid), regulation, lysogeny (in the case of temperate phages)  
322 and lysis.

323 Interestingly, Coruscant's large genomes is paralleled by a high genome  
324 complexity. It contains no less than 41 copies of tRNAs, covering 19 different amino  
325 acids - all standard amino acids except valine. Coruscant has also a relatively high  
326 fraction of coding sequences for which no function could be predicted (155  
327 hypothetical proteins out 290 CDS compared to 16/51 for Alderaan).

328 The phages were also found to encode homologs of bacterial regulators that are  
329 typically used by *Streptomyces* to control sporulation and overall development. For  
330 example, *whiB* (found in Alderaan, and Coruscant) and *ssgA* (found in Dagobah) are  
331 both essential for sporulation of *Streptomyces* [40–41]. Three phages (Coruscant,  
332 Endor1 and Endor2) also encode Lsr2-like proteins, which are nucleoid-associated  
333 proteins functioning as xenogeneic silencing proteins and are conserved throughout  
334 Actinobacteria [42].

335



Functional classes

■ DNA/RNA metabolism ■ DNA replication and repair ■ regulation ■ lysogeny ■ DNA packaging ■ virion structure and assembly ■ lysis ■ other function ■ hypothetical protein

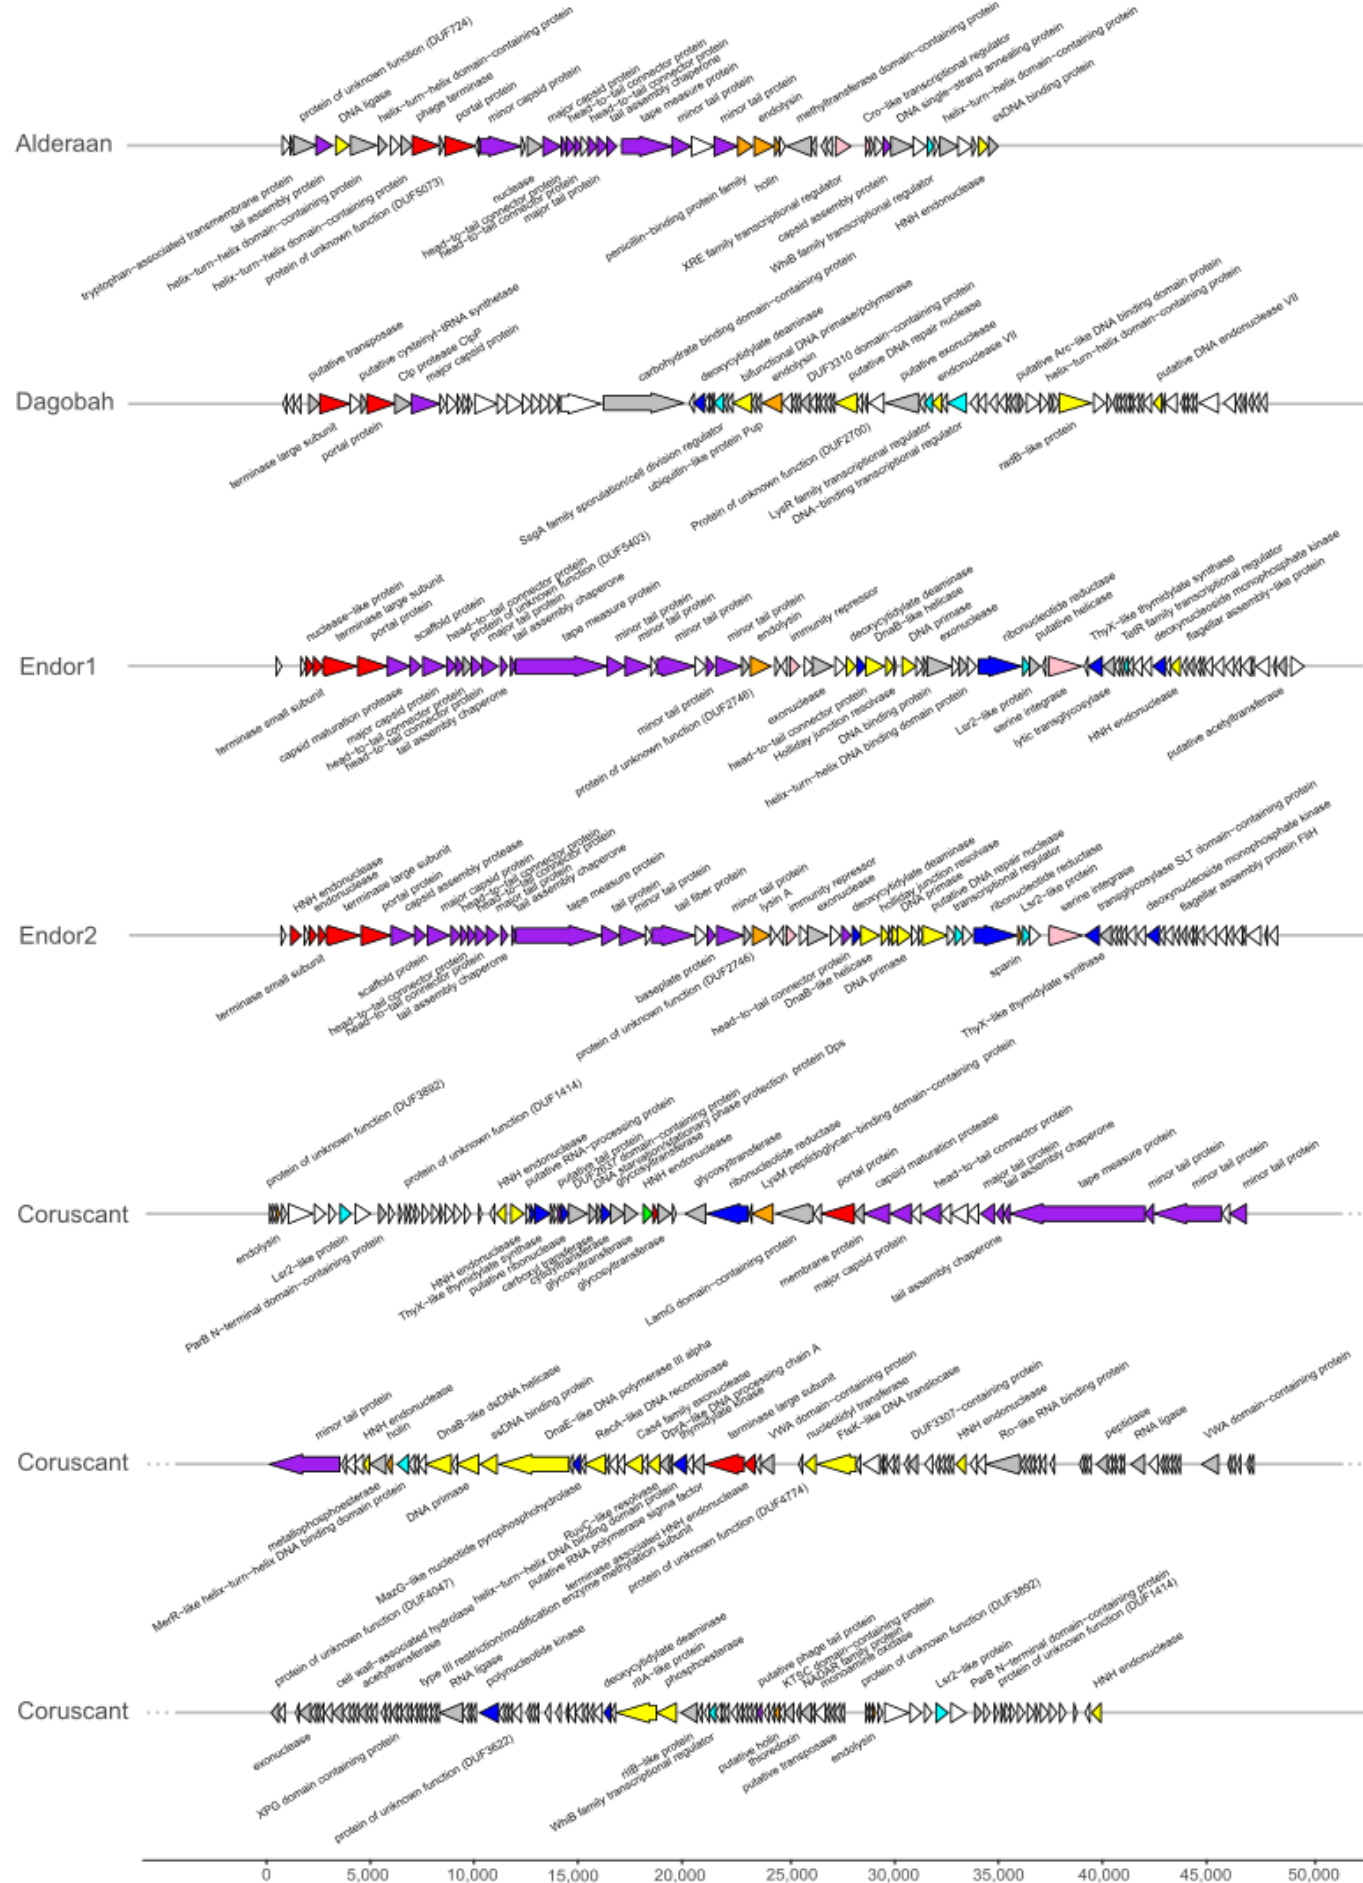

337 **Figure 3. Genome map of the five Streptomyces phages.** Open reading frames (ORFs) were  
 338 identified with Prodigal and functionally annotated using an automatic pipeline based on Prokka  
 339 [25]. The functional annotation was automatically improved and curated using hidden Markov  
 340 models (HMMs), and Blastp searches [26] against different databases (Prokaryotic Virus Orthologous  
 341 Groups (pVOGs) [27], viral proteins and Conserved Domain Database (CDD)) [28]. Genome maps  
 342 were created using the R package gggenes.

#### 343 3.4 Average nucleotide identity (ANI) analysis

344 We established the sequence relationship between the newly sequenced  
 345 *Streptomyces* phages and the selected genomes from the representative group  
 346 members of actinophages. The Average nucleotide identity (ANI) based clustering  
 347 dendrogram analysis showed four (Endor1, Endor2, Alderaan, and Coruscant) out  
 348 of five phage genomes clustered confidently with the members of already known  
 349 clusters (Endor1/Endor2: BD, Coruscant: BE, and Alderaan: BC) (Figure 4).  
 350 However, one of the phage genomes (Dagobah) does not share sufficient similarity  
 351 and was therefore clustered as an unresolved group. As expected, the overall  
 352 analysis showed that except Dagobah, all four phages show close relatedness to  
 353 *Streptomyces* phages.

354

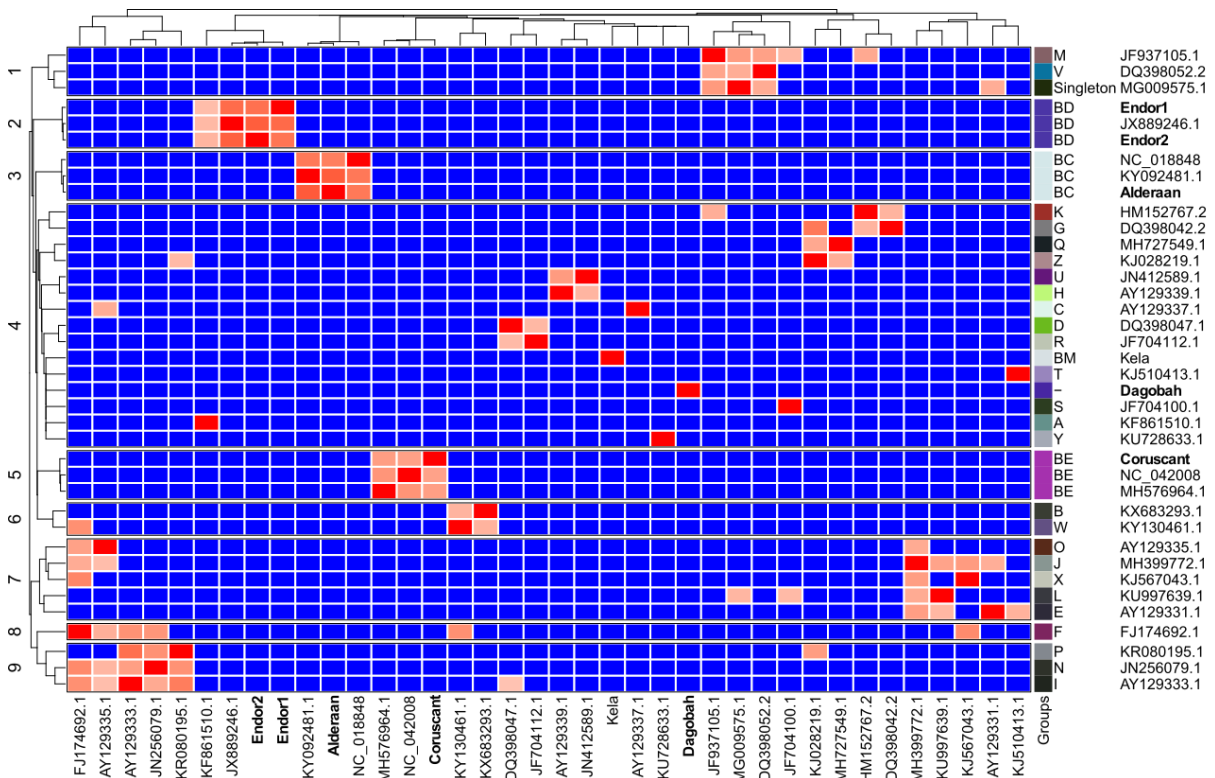

355

356 **Figure 4. Average nucleotide-based dendrogram analysis using 38 actinophage genomes.** These 38  
 357 genomes include 31 genomes downloaded from the Actinophage Database (<https://phagesdb.org/>),  
 358 two genomes from NCBI based on close relatedness, and the five newly sequenced phages. The group  
 359 of each phage, as defined by the Actinophage Database, is indicated.

360

361

362 3.5 Protein domain-based analysis

363 Sequence relationship between the phage genomes is most commonly  
364 determined with the help of genome-wide similarity or average nucleotide identity-  
365 based analysis. However, a traditional method such as phylogeny with single genes  
366 is challenging because of the high variability and lack of universal genes across the  
367 phage genomes. Thus, we used additional phyletic-based analysis to establish a  
368 sequence relationship between the phage genomes. The hierarchical clustering  
369 dendrogram based on the identified 703 Pfam domains presence-absence matrix  
370 confidently clusters newly sequenced phages with known actinophages (Figure 5).  
371 In comparison to ANI-based analysis, hierarchical clustering showed congruent  
372 topology for the four newly sequenced *Streptomyces* phage genomes (Endor1 and  
373 Endor2: BD cluster, Alderaan: BC cluster, and Coruscant: BE cluster)  
374 (Supplementary Figures S2-S5). It also resolved polytomy between the unresolved  
375 groups and showed that Dagobah comes under the singleton group, consisting of  
376 highly divergent phages. Moreover, a high level of congruence was observed  
377 between already known groups and the groups identified by our hierarchical  
378 clustering. Thus, our results strongly suggest domain-based phyletic or hierarchical  
379 clustering analysis as an alternate way of classification of newly sequenced phage  
380 genomes.

381



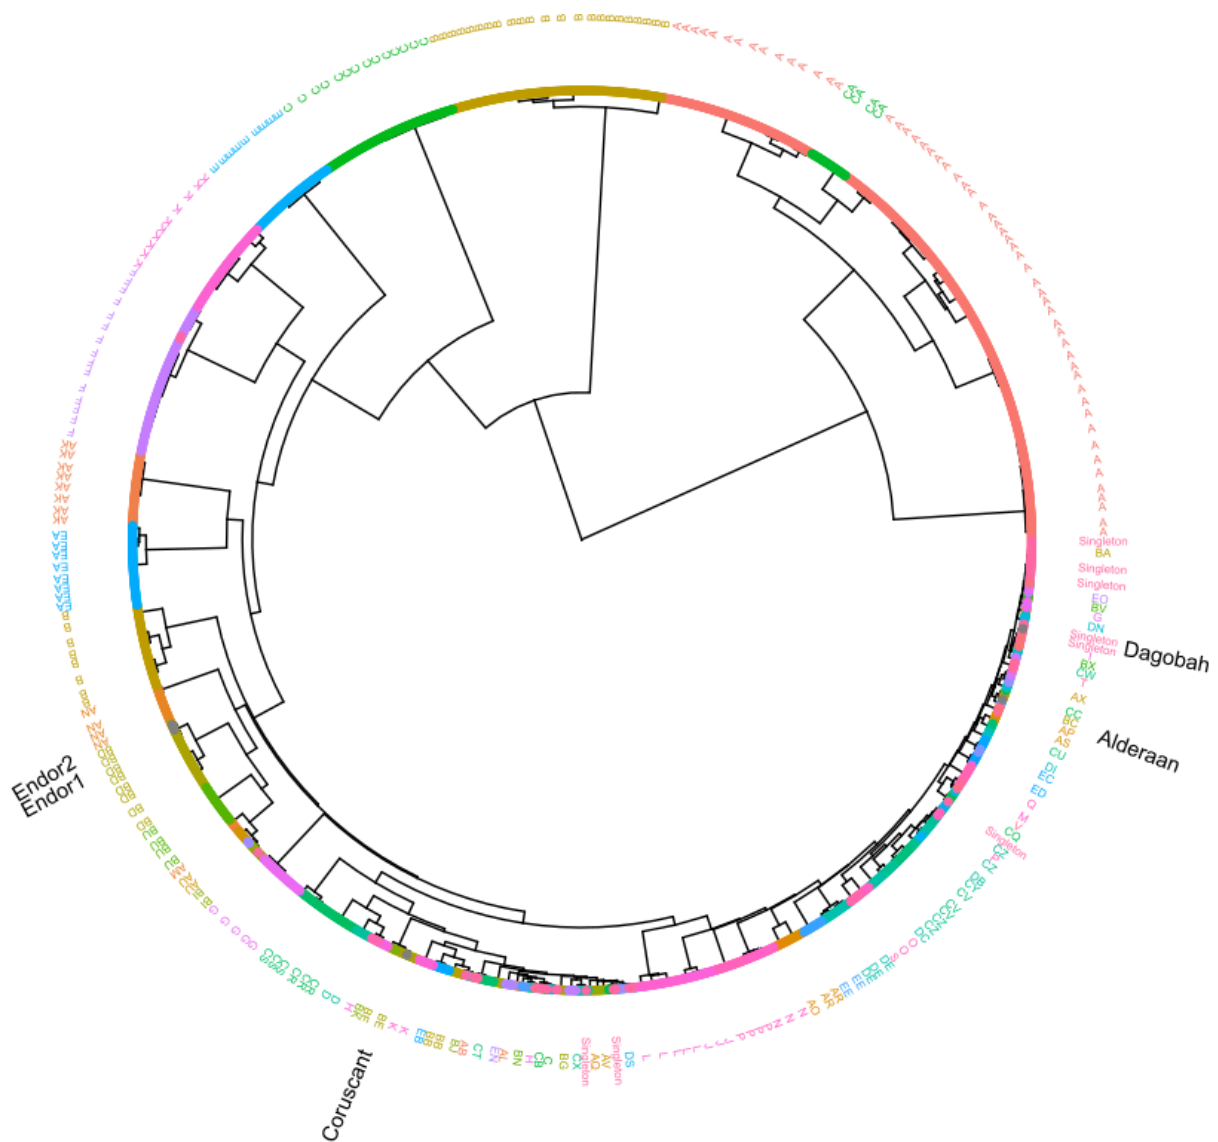

382

383 **Figure 5. Protein domain-based hierarchical clustering.** The dendrogram was constructed based on  
384 the presence-absence matrix of the > 700 Pfam protein domains identified from 2486 actinophage  
385 genomes. Phages are color-coded according to known groups from the Actinobacteriophage Database  
386 (<https://phagesdb.org/>) [31]. The position of the five new phage genomes is indicated as black text.

387

388

389

390

#### 391 4. Discussion

392 In this study, we report the isolation and characterization of five novel  
393 *Streptomyces* phages. Alderaan and Coruscant were isolated using *S. venezueale*,  
394 while *S. coelicolor* was the host used for isolation of Dagobah, Endor1 and Endor2.

395 Four for of them (Alderaan, Dagobah, Endor1 and Endor2) were predicted to be  
396 temperate phages. In contrast, Coruscant was predicted to feature a lytic lifestyle,  
397 and exhibits a large genome (superior to 130 kb) with a low GC content (48%), in  
398 comparison to the 72% of its *Streptomyces* host. Coruscant also encodes 41 copies of

399 tRNA genes, spanning 19 of the 20 standard amino acids. This large tRNA gene  
400 repertoire could be used to optimize gene expression in hosts that have differing  
401 codon usage patterns or to counteract potential tRNA-based degradation defense  
402 systems [43]. Altogether, the combination of a low GC content and a substantial  
403 tRNA equipment suggests a recent adaptation of the phage Coruscant to  
404 *Streptomyces*.

405 ANI and hierarchical clustering analysis revealed that Alderaan, Coruscant and  
406 Endor1/Endor2 belong to clusters BC, BE and BD defined by PhagesDB [31],  
407 respectively. In contrast, Dagobah showed very little homology with described  
408 phages, and was thus considered as a singleton. This finding highlights the largely  
409 untapped phage diversity, making the isolation of entirely “novel” phages still  
410 possible.

411 *Streptomyces* are characterized by their complex lifestyle and cellular  
412 differentiation. Interestingly, the isolated actinophages also encode homologs of  
413 SsgA, WhiB and Lsr2 proteins – regulatory proteins typically encoded by their hosts.  
414 The *ssgA* gene product was previously shown to be necessary for proper sporulation  
415 of *Streptomyces coelicolor* [41]; *whiB* is also essential for sporulation of *Streptomyces*  
416 and was already reported to be found in several actinophages [44–46]. Interestingly,  
417 the WhiB-like protein of mycobacteriophage TM4, WhiB<sub>TM4</sub>, was shown to inhibit  
418 the transcription of Mycobacterium *whiB2*. Expression of WhiB<sub>TM4</sub> in *M. smegmatis*  
419 led to hindered septation resembling a WhiB2 knockout phenotype, highlighting  
420 how phage can interfere with their host’s development [45].

421 Lsr2-like proteins are nucleoproteins conserved in actinobacteria. In  
422 *Streptomyces*, they were recently shown to silence cryptic specialized metabolic  
423 clusters [47]. The first example of a phage-encoded Lsr2-like protein is the prophage-  
424 encoded Lsr2-like protein CgpS in *Corynebacterium glutamicum*. CgpS was shown to  
425 maintain the lysogenic state of the prophage on which it resides. Further  
426 bioinformatic searches revealed that Lsr2-like proteins are abundant in  
427 actinophages, with almost 20% of *Streptomyces* phages encoding such proteins [42].  
428 However, their role in the coordination of the phage life cycle remains still unclear.  
429 Altogether, these observations suggest that phages manipulate their host  
430 development, by interfering with central processes such as sporulation and  
431 antibiotic production.

432 More generally, the specificities of *Streptomyces* – especially its morphological  
433 complexity – impact the phage isolation and characterization process. For example,  
434 the mycelial nature of streptomycetes complicates quantitative studies. The notion  
435 of MOI loses a lot of its significance once mycelium has formed, as the network  
436 structure originating from one spore has greatly increased phage adsorption but  
437 would still be counted as one CFU [14,48]. Furthermore, the formation of clumps,  
438 although mitigated by the addition of glass beads or increase of osmotic pressure  
439 [49], makes accurate monitoring of cell growth (based on optical density or  
440 backscatter) difficult.

441 *S. coelicolor* was established as a model system for the *Streptomyces* genus partly  
442 because of its prolific pigment production [50]. Interestingly, we observed colored

443 halos around the plaques formed by the *S. coelicolor* phages. Exposure to ammonia  
444 fume confirmed that these colored halos contain actinorhodin. This observation  
445 suggests that *Streptomyces* release metabolites in reaction to phage predation, some  
446 of which may potentially have anti-phage properties as it was shown recently with  
447 anthracyclines in *Streptomyces peucetius* [51].

448 Understanding the processes governing phage infection has the potential to  
449 illuminate the basic physiology of their hosts. Therefore, phages can serve as a basis  
450 to study *Streptomyces*' specific traits—its complex reproduction cycle and abundant  
451 production of secondary metabolites—in the context of phage infection.

452

453



454 **Supplementary Materials:** The following are available online at  
455 [www.mdpi.com/xxx/s1](http://www.mdpi.com/xxx/s1),

456 Figure S1: Close-ups of phage plaques imaged using a Nikon SMZ18  
457 stereomicroscope, before (upper row) and after (lower row) exposure to ammonia  
458 fumes.

459 Figure S2: Subclade dendrogram with *Streptomyces* phage Alderaan and its closely  
460 related actinophages.

461 Figure S3: Subclade dendrogram with *Streptomyces* phage Coruscant and its closely  
462 related actinophages.

463 Figure S4: Subclade dendrogram with *Streptomyces* phage Dagobah and its closely  
464 related actinophages.

465 Figure S5: Subclade dendrogram with *Streptomyces* phages Endor1 and Endor2 and  
466 their closely related actinophages

467

468 Supplementary Table 1: List of the functional annotation of proteins ORFs within  
469 phage genomes

470

471 **Author Contributions:** Conceptualization, A.H., and J.F.; methodology, All;  
472 validation, All; formal analysis, All; investigation, A.H. and L.K.; resources, V.S. and  
473 J.F.; data curation, A.H. and V.S.; writing—original draft preparation, A.H. and V.S.;  
474 writing—review and editing, All; visualization, A.H., V.S. and L.K.; supervision, J.F.;  
475 project administration, J.F.; funding acquisition, J.F. All authors have read and  
476 agreed to the published version of the manuscript

477

478 **Funding:** We thank the European Research Council (ERC Starting Grant, grant  
479 number 757563) for financial support. A. H. was supported by a fellowship from the  
480 Ecole Normale Supérieure (Paris, France).

481

482 **Acknowledgments:** We thank David Brandt (Center for Biotechnology, University  
483 of Bielefeld) for his help with genome assembly and Julio Ortiz (Forschungszentrum  
484 Jülich) for his assistance during electron microscopy. The *S. cyaneofuscatus* and *S.*  
485 *olivaceus* strains were kindly provided by the German Collection of Microorganisms  
486 and Cell Cultures (DSMZ). We are also grateful to the entire Frunzke lab for fruitful  
487 discussions.

488

489 **Conflicts of Interest:** The authors declare no conflict of interest.

490

## 491 References

- 492 1. M. J. Bibb, « Understanding and manipulating antibiotic production in actinomycetes », *Biochem Soc Trans*,  
493 vol. 41, n° 6, p. 1355-1364, 2013, doi: 10.1042/BST20130214.
- 494 2. D. A. Hopwood, *Streptomyces in Nature and Medicine: The Antibiotic Makers*. Oxford, New York: Oxford  
495 University Press, 2007.
- 496 3. T. Keiser, M. J. Bibb, M. J. Buttner, K. F. Chater, et D. A. Hopwood, *Practical Streptomyces Genetics*. Norwich:  
497 The John Innes Foundation, 2000.
- 498 4. M. A. Elliot, M. J. Buttner, J. R. Nodwell, « 24 Multicellular Development in *Streptomyces* », *Myxobacteria*, p.  
499 419-438, 2008, doi: 10.1128/9781555815677.ch24.
- 500 5. J. R. McCormick, K. Flårdh, « Signals and regulators that govern *Streptomyces* development », *FEMS*  
501 *Microbiol Rev*, vol. 36, n° 1, p. 206-231, 2012, doi: 10.1111/j.1574-6976.2011.00317.x.
- 502 6. J. Anne, W. Wohlleben, H. J. Burkardt, R. Springer, A. Pohler, « Morphological and Molecular  
503 Characterization of Several Actinophages Isolated from Soil Which Lyse *Streptomyces cattleya* or *S.*  
504 *venezuelae* », *Microbiology*, vol. 130, n° 10, p. 2639-2649, 1984, doi: 10.1099/00221287-130-10-2639.
- 505 7. S. Donadio, R. Paladino, I. Costanzi, P. Sparapani, W. Schreil, M. Iaccarino, « Characterization of  
506 bacteriophages infecting *Streptomyces erythreus* and properties of phage-resistant mutants. », *J Bacteriol*, vol.  
507 166, n° 3, p. 1055-1060, 1986.
- 508 8. J. E. Dowding, « Characterization of a Bacteriophage Virulent for *Streptomyces coelicolor* A3 (2) |  
509 Microbiology Society », *Journal of General Microbiology*, vol. 76, p. 163-176, 1973.
- 510 9. N. D. Lomovskaya, N. M. Mkrtumian, N. L. Gostinskaya, V. N. Danilenko, « Characterization of  
511 Temperate Actinophage oC31 Isolated from *Streptomyces coelicolor* A3(2) », *J. VIROL.*, vol. 9, p. 5, 1972.
- 512 10. M. C. M. Smith, R. N. Burns, S. E. Wilson, M. A. Gregory, « The complete genome sequence of the  
513 *Streptomyces* temperate phage  $\phi$ C31: evolutionary relationships to other viruses », *Nucleic Acids Res*, vol.  
514 27, n° 10, p. 2145-2155, 1999, doi: 10.1093/nar/27.10.2145.
- 515 11. M. C. M. Smith *et al.*, « Evolutionary Relationships among Actinophages and a Putative Adaptation for  
516 Growth in *Streptomyces* spp. », *Journal of Bacteriology*, vol. 195, n° 21, p. 4924-4935, 2013, doi:  
517 10.1128/JB.00618-13.
- 518 12. J. Burke, D. Schneider, J. Westpheling, « Generalized transduction in *Streptomyces coelicolor* », *PNAS*, vol.  
519 98, n° 11, p. 6289-6294, 2001, doi: 10.1073/pnas.101589398.
- 520 13. N. D. Lomovskaya, K. F. Chater, N. M. Mkrtumian, « Genetics and molecular biology of *Streptomyces*  
521 bacteriophages. », *Microbiology and Molecular Biology Reviews*, vol. 44, n° 2, p. 206-229, 1980.
- 522 14. A. Rosner, R. Gustin, « Adsorption of actinophage Pal 6 to developing mycelium of *Streptomyces* », 1980.
- 523 15. T. C. Jordan *et al.*, « A Broadly Implementable Research Course in Phage Discovery and Genomics for First-  
524 Year Undergraduate Students », *mBio*, vol. 5, n° 1, 2014, doi: 10.1128/mBio.01051-13.
- 525 16. S. T. Pullan, G. Chandra, M. J. Bibb, M. Merrick, « Genome-wide analysis of the role of GlnR in *Streptomyces*  
526 *venezuelae* provides new insights into global nitrogen regulation in actinomycetes », *BMC Genomics*, vol. 12,  
527 p. 175, 2011, doi: 10.1186/1471-2164-12-175.
- 528 17. D. Weaver *et al.*, « Genome plasticity in *Streptomyces*: identification of 1 Mb TIRs in the *S. coelicolor* A3(2)  
529 chromosome: Identification of 1 Mb TIRs in *S. coelicolor* A3(2) », *Molecular Microbiology*, vol. 51, n° 6, p.  
530 1535-1550, 2004, doi: 10.1111/j.1365-2958.2003.03920.x.
- 531 18. S. D. Bentley *et al.*, « Complete genome sequence of the model actinomycete *Streptomyces coelicolor* A3(2) »,  
532 *Nature*, vol. 417, n° 6885, p. 141-147, 2002, doi: 10.1038/417141a.
- 533 19. M. D. Shepherd, M. K. Kharel, M. A. Bosserman, J. Rohr, « Laboratory Maintenance of *Streptomyces*  
534 species », *Curr Protoc Microbiol*, vol. CHAPTER, p. Unit-10E.1, 2010, doi:  
535 10.1002/9780471729259.mc10e01s18.
- 536 20. K. M. Kauffman M. F. Polz, « Streamlining standard bacteriophage methods for higher throughput »,  
537 *MethodsX*, vol. 5, p. 159-172, 2018, doi: 10.1016/j.mex.2018.01.007.
- 538 21. F. Kensity, E. Zang, C. Faulhammer, R.-K. Tan, J. Büchs, « Validation of a high-throughput fermentation  
539 system based on online monitoring of biomass and fluorescence in continuously shaken microtiter plates »,  
540 *Microb. Cell Fact.*, vol. 8, p. 31, 2009, doi: 10.1186/1475-2859-8-31.
- 541 22. C. Rückert *et al.*, « Complete genome sequence of *Streptomyces lividans* TK24 », *J. Biotechnol.*, vol. 199, p.  
542 21-22, 2015, doi: 10.1016/j.jbiotec.2015.02.004.
- 543 23. D. Gordon P. Green, « ConSeq: a graphical editor for next-generation sequencing », *Bioinformatics*, vol. 29,  
544 n° 22, p. 2936-2937, 2013, doi: 10.1093/bioinformatics/btt515.

- 545 24. D. Hyatt, G.-L. Chen, P. F. LoCasio, M. L. Land, F. W. Larimer, L. J. Hauser, « Prodigal: prokaryotic gene  
546 recognition and translation initiation site identification », *BMC Bioinformatics*, vol. 11, n° 1, p. 119, 2010, doi:  
547 10.1186/1471-2105-11-119.
- 548 25. T. Seemann, « Prokka: rapid prokaryotic genome annotation », *Bioinformatics*, vol. 30, n° 14, p. 2068-2069,  
549 2014, doi: 10.1093/bioinformatics/btu153.
- 550 26. S. F. Altschul, W. Gish, W. Miller, E. W. Myers, D. J. Lipman, « Basic local alignment search tool », *Journal*  
551 *of Molecular Biology*, vol. 215, n° 3, p. 403-410, 1990, doi: 10.1016/S0022-2836(05)80360-2.
- 552 27. A. L. Grazziotin, E. V. Koonin, D. M. Kristensen, « Prokaryotic Virus Orthologous Groups (pVOGs): a  
553 resource for comparative genomics and protein family annotation », *Nucleic Acids Res*, vol. 45, n° D1, p.  
554 D491-D498, 2017, doi: 10.1093/nar/gkw975.
- 555 28. A. Marchler-Bauer *et al.*, « CDD: NCBI's conserved domain database », *Nucleic Acids Res*, vol. 43, n° D1, p.  
556 D222-D226. 2015, doi: 10.1093/nar/gku1221.
- 557 29. J. R. Garneau, F. Depardieu, L.-C. Fortier, D. Bikard, M. Monot, « PhageTerm: a tool for fast and accurate  
558 determination of phage termini and packaging mechanism using next-generation sequencing data », *Scientific Reports*,  
559 vol. 7, n° 1, p. 8292, 2017, doi: 10.1038/s41598-017-07910-5.
- 560 30. P. Tynecki, A. Guziński, J. Kazimierzczak, M. Jadczyk, J. Dastyk, A. Onisko, « PhageAI - Bacteriophage Life  
561 Cycle Recognition with Machine Learning and Natural Language Processing », *Bioinformatics*, preprint,  
562 2020. doi: 10.1101/2020.07.11.198606.
- 563 31. D. A. Russell G. F. Hatfull, « PhagesDB: the actinobacteriophage database », *Bioinformatics*, vol. 33, n° 5, p.  
564 784-786, 2017, doi: 10.1093/bioinformatics/btw711.
- 565 32. L. Pritchard, *widdowquinn/pyani*. 2020.
- 566 33. Z. Gu, R. Eils, M. Schlesner, « Complex heatmaps reveal patterns and correlations in multidimensional  
567 genomic data », *Bioinformatics*, vol. 32, n° 18, p. 2847-2849, 2016, doi: 10.1093/bioinformatics/btw313.
- 568 34. G. Yu, D. K. Smith, H. Zhu, Y. Guan, T. T.-Y. Lam, « ggtree: an r package for visualization and annotation  
569 of phylogenetic trees with their covariates and other associated data », *Methods in Ecology and Evolution*,  
570 vol. 8, n° 1, p. 28-36, 2017, doi: 10.1111/2041-210X.12628.
- 571 35. B. A. M. Rudd, D. A. Hopwood, « Genetics of Actinorhodin Biosynthesis by *Streptomyces coelicolor* A3(2) », *Microbiology*,  
572 vol. 114, n° 1, p. 35-43, 1979, doi: 10.1099/00221287-114-1-35.
- 573 36. S. T. Abedon, « Lysis from without », *Bacteriophage*, vol. 1, n° 1, p. 46-49, 2011, doi: 10.4161/bact.1.1.13980.
- 574 37. S. T. Abedon, « Detection of Bacteriophages: Phage Plaques », in *Bacteriophages: Biology, Technology, Therapy*,  
575 D. R. Harper, S. T. Abedon, B. H. Burrowes, M. L. McConville, Éd. Cham: Springer International Publishing,  
576 2018, p. 1-32.
- 577 38. D. Botstein, « A Theory of Modular Evolution for Bacteriophages\* », *Annals of the New York Academy of*  
578 *Sciences*, vol. 354, n° 1, p. 484-491, 1980, doi: 10.1111/j.1749-6632.1980.tb27987.x.
- 579 39. H. Brüßow, F. Desiere, « Comparative phage genomics and the evolution of *Siphoviridae*: insights from  
580 dairy phages », *Molecular Microbiology*, vol. 39, n° 2, p. 213-223, 2001, doi: 10.1046/j.1365-2958.2001.02228.x.
- 581 40. V. Molle, W. J. Palframan, K. C. Findlay, M. J. Buttner, « WhiD and WhiB, homologous proteins required  
582 for different stages of sporulation in *Streptomyces coelicolor* A3(2) », *J. Bacteriol.*, vol. 182, n° 5, p. 1286-1295,  
583 2000, doi: 10.1128/jb.182.5.1286-1295.2000.
- 584 41. G. P. van Wezel, J. van der Meulen, S. Kawamoto, R. G. M. Luiten, H. K. Koerten, B. Kraal, « *ssgA* Is Essential  
585 for Sporulation of *Streptomyces coelicolor* A3(2) and Affects Hyphal Development by Stimulating Septum  
586 Formation », *Journal of Bacteriology*, vol. 182, n° 20, p. 5653-5662, 2000, doi: 10.1128/JB.182.20.5653-5662.2000.
- 587 42. E. Pfeifer, M. Hünnefeld, O. Popa, J. Frunzke, « Impact of Xenogeneic Silencing on Phage-Host  
588 Interactions », *Journal of Molecular Biology*, 2019, doi: 10.1016/j.jmb.2019.02.011.
- 589 43. P. Hyman, S. T. Abedon, « Chapter 7 - Bacteriophage Host Range and Bacterial Resistance », in *Advances in*  
590 *Applied Microbiology*, vol. 70, Academic Press, 2010, p. 217-248.
- 591 44. P. Morris, L. J. Marinelli, D. Jacobs-Sera, R. W. Hendrix, G. F. Hatfull, « Genomic Characterization of  
592 Mycobacteriophage Giles: Evidence for Phage Acquisition of Host DNA by Illegitimate Recombination », *J Bacteriol.*,  
593 vol. 190, n° 6, p. 2172-2182, 2008, doi: 10.1128/JB.01657-07.
- 594 45. J. Rybniker *et al.*, « Insights into the function of the WhiB-like protein of mycobacteriophage TM4--a  
595 transcriptional inhibitor of WhiB2 », *Mol. Microbiol.*, vol. 77, n° 3, p. 642-657, 2010, doi: 10.1111/j.1365-  
596 2958.2010.07235.x.
- 597 46. W. Van Dessel *et al.*, « Complete genomic nucleotide sequence and analysis of the temperate bacteriophage  
598 VWB », *Virology*, vol. 331, n° 2, p. 325-337, 2005, doi: 10.1016/j.virol.2004.10.028.



- 599 47. E. J. Gehrke *et al.*, « Silencing cryptic specialized metabolism in *Streptomyces* by the nucleoid-associated  
600 protein Lsr2 », *eLife*, vol. 8, p. e47691, 2019, doi: 10.7554/eLife.47691.
- 601 48. C. M. Gilmour, E. C. Noller, B. Watkins, « STUDIES ON *STREPTOMYCES* PHAGE: I. Growth  
602 Characteristics of the *Streptomyces griseus* Host-Phage System », *Journal of Bacteriology*, vol. 78, n° 2, p.  
603 186-192, 1959.
- 604 49. L. D. Nguyen *et al.*, « Cultivation System Using Glass Beads Immersed in Liquid Medium Facilitates Studies  
605 of *Streptomyces* Differentiation », *Appl. Environ. Microbiol.*, vol. 71, n° 6, p. 2848-2852, 2005, doi:  
606 10.1128/AEM.71.6.2848-2852.2005.
- 607 50. K. Chater, « David Hopwood and the emergence of *Streptomyces* genetics », *Int. Microbiol.*, vol. 2, n° 2, p.  
608 61-68, 1999.
- 609 51. S. Kronheim *et al.*, « A chemical defence against phage infection », *Nature*, vol. 564, n° 7735, p. 283, 2018,  
610 doi: 10.1038/s41586-018-0767-x.

611
