# 1 **Genome sequence and characterization of five** 2 **bacteriophages infecting *Streptomyces coelicolor* and** 3 ***Streptomyces venezuelae*: Alderaan, Coruscant, Dagobah,** 4 **Endor1 and Endor2**

5 **Aël Hardy, Vikas Sharma, Larissa Kever and Julia Frunzke\***

6 Institute of Bio- und Geosciences, IBG-1: Biotechnology, Forschungszentrum Jülich, 52425 Jülich, Germany

7 \* Correspondence: [j.frunzke@fz-juelich.de](mailto:j.frunzke@fz-juelich.de); Tel.: +49 2461 615430

8 **Abstract:** *Streptomyces* are well-known antibiotic producers, and are also characterized by  
9 a complex morphological differentiation. *Streptomyces*, like all bacteria, are confronted  
10 with the constant threat of phage predation, which in turn shapes bacterial evolution.  
11 However, despite significant sequencing efforts recently, relatively few phages infecting  
12 *Streptomyces* have been characterized compared to other genera. Here, we present the  
13 isolation and characterization of five novel *Streptomyces* phages. All five phages belong to  
14 the *Siphoviridae* family, based on their morphology as determined by transmission electron  
15 microscopy. Genome sequencing revealed that four of them were temperate phages, while  
16 one had a lytic lifestyle. Moreover, one of the newly sequenced phages shows very little  
17 homology to already described phages, highlighting the still largely untapped viral diversity.  
18 Altogether, this study expands the number of characterized phages of *Streptomyces* and  
19 sheds light on phage evolution and phage-host dynamics in *Streptomyces*.

20 **Keywords:** phage isolation; phage genomics; *Streptomyces*; *Siphoviridae*;  
21 actinobacteriophages, actinorhodin

---

## 24 **1. Introduction**

25 *Streptomyces* is a genus of Gram-positive bacteria belonging to the order of Actinobacteria,  
26 and exhibit a high GC-content (on average about 73 mol% G + C). *Streptomyces* are prolific  
27 producers of natural products with a wide range of biological activities. This repertoire of  
28 bioactive molecules has been harnessed for medical and agricultural purposes, as for example  
29  $\frac{2}{3}$  of known antibiotics of microbial origin are produced by *Streptomyces* [1-3].

30 Another distinctive feature of *Streptomyces* is their complex developmental cycle. Unlike  
31 most bacteria—that divide by binary fission, *Streptomyces* development is instead centered  
32 on the formation of spores. Germinating spores first form a network of interconnected cells,  
33 called vegetative mycelium. The vegetative mycelium later serves as a basis for the  
34 coordinated erection of an aerial mycelium. This is followed by the segmentation of these  
35 aerial filaments into spores, which can then start a new cycle [3-5].

36 Phages infecting *Streptomyces* were described at a quick pace in the 1970-1980s, but most  
37 of them were not later sequenced [6-8]. The phage phiC31 represents a notable exception to  
38 this trend, as it was used to develop crucial genetic tools for *Streptomyces* before being  
39 sequenced in 1999 [9-11]. Phages R4, SV1, VP5 were also the subject of numerous studies,  
40 but the latter was not sequenced [12–13].

41 *Streptomyces* peculiarities were studied in the context of phage infection. For example,  
42 adsorption to mycelium of phage Pal6 was shown to differ depending on the stage of  
43 development of *Streptomyces albus* [14]. In this instance, phage adsorption was found to be  
44 maximal for germinating spores. Combined with the observation that germinating spores

45 showed an intense average metabolic activity, this suggests that spore germination represents  
46 the most sensitive development stage for phage infection.

47 Conversely, the recent years have seen a sustained effort into the isolation and  
48 sequencing of *Streptomyces* phages, notably by the SEA-PHAGES (Science Education  
49 Alliance-Phage Hunters Advancing Genomics and Evolutionary Science) program in the  
50 USA (<https://seaphages.org/>) [15]. However, few of these phages were extensively  
51 characterized.

52 Here, we report the isolation, characterization and genome analysis of five novel  
53 *Streptomyces* phages. Two of them (Alderaan and Coruscant) were isolated using *S.*  
54 *venezuelae*, the remaining three (Dagobah, Endor1 and Endor2) were isolated using *S.*  
55 *coelicolor*. Observation with transmission electron microscopy showed that all five phages  
56 belong to the *Siphoviridae* family. Lifestyle prediction with the complete nucleotide  
57 sequences revealed that four (Alderaan, Dagobah, Endor1 and Endor2) are temperate, while  
58 Coruscant is thought to be a lytic phage. Alderaan, Coruscant, Endor1 and Endor2 show close  
59 relatedness to already described *Streptomyces* phages – Endor1 and Endor2 being highly  
60 homologous to each other. In contrast, Dagobah showed very little relatedness to any  
61 sequenced phage, highlighting the still massively untapped viral diversity.

## 62 **2. Materials and Methods**

### 63 *2.1 Bacterial strains and growth conditions*

64 *Streptomyces venezuelae* ATCC 10712 [16] and *Streptomyces coelicolor* M600 [17] and  
65 strain M145 [18] were used as main host strains in this study. Cultures were started by  
66 inoculating spores from spore stocks stored in 20% glycerol at -20°C [19]. *S. venezuelae* was  
67 grown in liquid Glucose Yeast Malt extract (GYM) medium, while *S. coelicolor* was grown  
68 in liquid Yeast Extract Malt Extract (YEME) medium. Unless otherwise stated, cultivation  
69 was carried out at 30°C. For double agar overlays, GYM agar was used for both species, with  
70 0.5% and 1.5% agar for the top and bottom layers, respectively.

### 72 *2.2 Phage isolation and propagation*

73 Phages were isolated from soil samples taken near the Forschungszentrum Jülich  
74 (Germany). Phages contained in soil samples were resuspended by incubation in sodium  
75 chloride/magnesium sulfate (SM) buffer (10 mM Tris-HCl pH 7.3, 100 mM NaCl, 10 mM  
76 MgSO<sub>4</sub>, 2mM CaCl<sub>2</sub>) for 2 hours. The samples were centrifuged at 5,000 × g for 10 min to  
77 remove solid impurities. The supernatants were filtered through a 0.22-µm pore-size  
78 membrane filter to remove bacteria. For each sample, 1 ml of filtered supernatant was mixed  
79 with 3 ml of liquid medium inoculated with 10<sup>7</sup> *Streptomyces* spores.

80 After overnight incubation, the culture supernatant was collected by centrifugation at  
81 5,000 × g for 10 min and filtered through a 0.22-µm pore-size membrane filter. Serial  
82 dilutions of the filtrate were then spotted on a bacterial lawn propagated by mixing 200 µl of  
83 *Streptomyces* overnight culture with 4 ml top agar, according to a modified version of the  
84 double agar overlay method [20]. Plaques were visualized after overnight incubation at 30°C.

85 Purification of the phage samples was carried out by restreaking single plaques twice  
86 [20]. Phage amplification was achieved by mixing 100 µl of the purified phage lysate into  
87 top agar to obtain confluent lysis on the plate. After overnight incubation, 5 ml of SM buffer  
88 were used to soak the plates and resuspend phages. The resulting phage lysate was  
89 centrifuged, and the supernatant was filtered to obtain the high-titer phage solution used for  
90 downstream processes.

91 To assess presence of actinorhodin, the plates were inverted and exposed to ammonia  
92 fumes for 15 min by placing 5 ml of 20% ammonium hydroxide solution on the inner surface  
93 of the lid.

94

### 95 2.3 Electron microscopy observation of phage virions

96 For electron microscopy, 5  $\mu$ l of purified phage suspension were deposited on a glow-  
97 discharged formvar carbon-coated nickel grids (200 mesh; Maxtaform; Plano, Wetzlar,  
98 Germany) and stained with 0.5% (wt/vol) uranyl acetate. After air drying, the sample was  
99 observed with a TEM LEO 906 (Carl Zeiss, Oberkochen, Germany) at an acceleration  
100 voltage of 60 kV.

101

### 102 2.4 Phage infection curves

103 Infection in shake flasks (*S. venezuelae* phages): 70 ml GYM medium were inoculated  
104 with  $10^5$  spores and incubated at 30°C for 6-8 hours to allow spore germination. Phages were  
105 then added at the corresponding multiplicity of infection (MOI). OD<sub>450</sub> was measured over  
106 time to assess bacterial growth. In parallel, the filtered supernatants of the cultures were  
107 collected at the same time points. 3  $\mu$ l of these supernatants were spotted on a *Streptomyces*  
108 *venezuelae* lawn (inoculated to an OD<sub>450</sub>=0.4) at the end of the experiment to estimate the  
109 phage titer.

110 Infection in microtiter plates (*S. coelicolor* phages): Growth experiments were  
111 performed in the BioLector® microcultivation system of m2p-labs (Aachen, Germany).  
112 Cultivation was performed as biological triplicates in 48-well FlowerPlates (m2plabs,  
113 Germany) at 30 °C and a shaking frequency of 1200 rpm [21]. Backscatter was measured by  
114 scattered light with an excitation wavelength of 620 nm (filter module:  $\lambda_{Ex}/\lambda_{Em}$ : 620 nm/ 620  
115 nm, gain: 25) every 15 minutes. Each well contained 1 ml YEME medium and was inoculated  
116 with  $10^6$  spores of *S. coelicolor* M145. Phages were added after 7 h, and sampling was  
117 performed at the indicated time points. Subsequently, 2  $\mu$ l of the supernatants were spotted  
118 on a lawn of *S. coelicolor* propagated on a double overlay of GYM agar inoculated at an  
119 initial OD<sub>450</sub>=0.4.

120

### 121 2.5 Host range determination

122 The host range of our phages was determined for the following *Streptomyces* species: *S.*  
123 *rimosus* (DSM 40260), *S. scabiei* (DSM 41658), *S. griseus* (DSM 40236), *S. platensis* (DSM  
124 40041), *S. xanthochromogenes* (DSM 40111), *S. mirabilis* (DSM 40553), *S. lividans* TK24  
125 [22], *S. olivaceus* (DSM 41536) and *S. cyaneofuscatus* (DSM 40148). The different  
126 *Streptomyces* species were grown in GYM medium, to which glass beads were added to favor  
127 dispersed growth.

128 The host range was determined by spotting serial dilutions of phage solution on lawns  
129 of the different *Streptomyces* species, in duplicates. A species was considered sensitive to a  
130 given phage only if single plaques could be detected; we further indicated if the phages are  
131 able to lyse a species (Table 1).

### 132 2.6 DNA isolation

133 For isolation of phage DNA, 1  $\mu$ l of 20 mg/ml RNase A and 1 U/ $\mu$ l DNase (Invitrogen)  
134 were added to 1 ml of the filtered lysates to limit contamination by host nucleic acids. The  
135 suspension was incubated at 37 °C for 30 min. Then, EDTA, proteinase K and SDS were  
136 added to the mixture at final concentrations of 50 mM (EDTA and proteinase K) and 1%

137 SDS (w/v), respectively. The digestion mixture was incubated for 1 h at 56°C, before adding  
138 250 µl of phenol:chloroform:isopropanol. The content was thoroughly mixed before  
139 centrifugation at 16,000 x g for 4 min.

140 The upper phase containing the DNA was carefully transferred to a clean  
141 microcentrifuge tube and 2 volumes of 100% ethanol were added as well as sodium acetate  
142 to a final concentration of 0.3 M. After centrifugation at 16,000 x g for 10 min, the  
143 supernatant was discarded, and the pellet washed with 1 ml 70% ethanol. Finally, the dried  
144 pellet was resuspended in 3 µl DNase-free water and stored at 4°C until analyzed.

145  
146  
147

#### 148 2.7 DNA sequencing and genome assembly

149 The DNA library was prepared using the NEBNext Ultra II DNA Library Prep Kit for  
150 Illumina according to the manufacturer's instructions and shotgun-sequenced using the  
151 Illumina MiSeq platform with a read length of 2 x 150bp (Illumina). In total, 100,000 reads  
152 were subsampled for each phage sample, and *de novo* assembly was performed with Newbler  
153 (GS De novo assembler; 454 Life Sciences, Brandford, USA). Finally, contigs were manually  
154 curated with Consed version 29.0 [23].

155

#### 156 2.8 Gene prediction and functional annotation

157 Open reading frames (ORFs) in the phage genomes were identified with Prodigal v2.6.3  
158 [24] and functionally annotated using an automatic pipeline using Prokka 1.11 [25]. The  
159 functional annotation was automatically improved and curated with hidden Markov models  
160 (HMMs), and Blastp [26] searches against different databases (Prokaryotic Virus  
161 Orthologous Groups (pVOGs)[27], viral proteins and Conserved Domain Database CDD  
162 [28]), with the e-value cutoff  $10^{-10}$ .

163 The annotated genomes were deposited in GenBank under the following accession  
164 numbers: MT711975 (Alderaan), MT711976 (Coruscant), MT711977 (Dagobah),  
165 MT711978 (Endor1) and MT711979 (Endor2).

166 The ends of the phage genomes were determined with PhageTerm [29] using default  
167 parameters. Phage lifecycle was predicted with PhageAI [30] using default parameters.

168

#### 169 2.9 Genome comparison and classification

170 To classify the unknown phage genomes at nucleotide level, 31 complete reference  
171 actinophage genomes belong to different known clusters were downloaded from the  
172 Actinobacteriophage Database [31]. The pairwise average nucleotide identity (ANI) were  
173 calculated with the five unknown *Streptomyces* phages including 31 reference genomes using  
174 the python program pyani 0.2.9 [32] with ANIb method. The output average percentage  
175 identity matrix file generated from pyani was used for clustering and displayed using the  
176 ComplexHeatmap package in R [33]. Phage genome map with functional annotation was  
177 displayed using the gggenes package in R.

#### 178 2.10 Protein domain-based classification

179 An alternative approach was used to classify newly sequenced phages based on  
180 conserved protein domains [28]. RPS-BLAST (Reverse PSI-BLAST) searches were  
181 performed with e-value cutoff 0.001 against the Conserved Domain Database [28] using the  
182 2486 complete reference actinophages [31], including the newly sequenced phage genomes.



183 Identified Pfam protein domains output files from each phage genome were merged and  
184 converted into a numerical presence-absence matrix. The hierarchical clustering dendrogram  
185 was constructed with the help of the ward.2 method using the R platform. The resulting  
186 dendrogram was visualized using ggtree [34].  
187

### 188 3. Results

#### 189 3.1 Phage isolation and virion morphology

190 Five novel phages infecting *Streptomyces* were isolated from soil samples close to the  
191 Forschungszentrum Jülich, Germany. The phages Alderaan and Coruscant were isolated  
192 using *Streptomyces venezuelae* ATCC 10712 and formed small, transparent and round  
193 plaques of approximately 2 mm of diameter (Figure 1A).

194 The phages Dagobah, Endor1 and Endor2 were isolated using *Streptomyces coelicolor*  
195 M600 as a host strain. Dagobah's plaques were very small (<1 mm) and were completely  
196 formed only after 2 days of incubation. Endor1 and Endor2 formed plaques of 2 mm in  
197 diameter with a distinct turbid zone in the center. Additionally, colored halos circling the  
198 plaques appeared after 3 days of incubation (Figure 1B). These halos were mostly brownish  
199 in the case of Dagobah, and reddish for Endor1 and Endor2. Exposure to ammonia fume  
200 resulted in a pronounced blue coloration around plaques, confirming that the halos  
201 surrounding plaques contained actinorhodin (Figure S1) [35].

202 TEM observation of the phage particles revealed that all five phages exhibit an  
203 icosahedral capsid and a non-contractile tail (Figure 1C). Based on the morphology, the  
204 phages were classified as members of the *Siphoviridae* family.

205

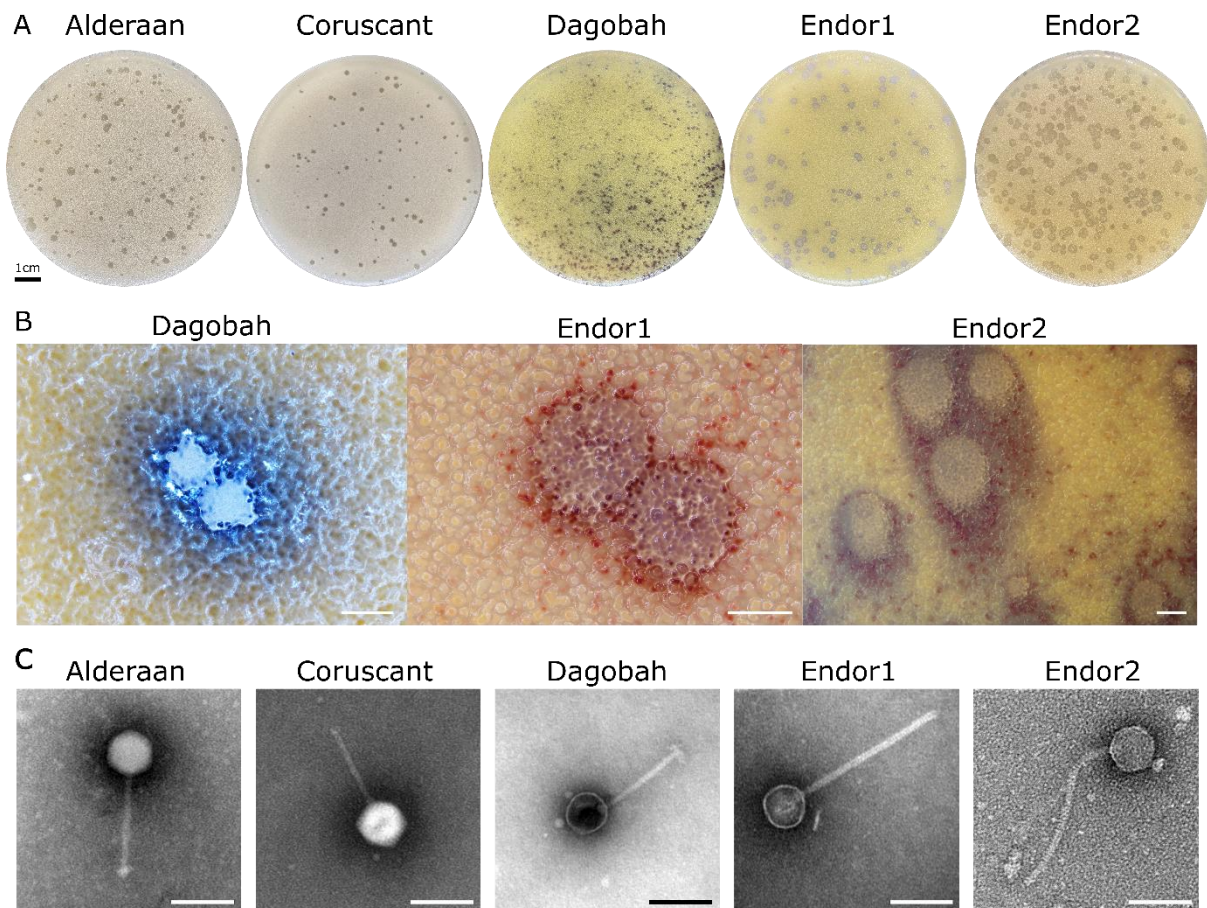

206

207 **Figure 1. Morphology observation of five novel *Streptomyces* phages.** (a) Plaque morphologies of the five  
208 phages. Double agar overlays were performed to infect *S.venezuelae* ATCC 10712 with the phages Alderaan  
209 and Coruscant, and *S. coelicolor* M600 with the phages Dagobah, Endor1 and Endor2. Plates were incubated  
210 overnight at 30°C and another day (3 days in the case of Dagobah) at room temperature to reach full maturity  
211 of the bacterial lawn; (b) Close-ups of phage plaques imaged using a stereomicroscope Nikon SMZ18. *S.*  
212 *coelicolor* M145 was infected by phages using GYM double agar overlays. The plates were incubated at 30°C  
213 overnight and then kept at room temperature for two (Endor1 and Endor2) or three days (Dagobah). Scale bar:  
214 1 mm; (c) Transmission electron microscopy (TEM) of phage isolates. The phage virions were stained with  
215 uranyl acetate. Scale bar: 150 nm.

### 216 3.2 Infection curves and host-range determination

217 Phage infection in liquid cultures was performed to assess infection dynamics. Due to  
218 the complex developmental cycle of *Streptomyces*, standard one-step growth curves could  
219 not be performed. We instead inoculated liquid cultures with spores of *Streptomyces* and let  
220 them germinate for approximately 7 h before adding the phages to a multiplicity-of-infection  
221 (MOI) from 0.1 to 10. For the *S. venezuelae* phages, infection was performed in flasks and  
222 OD<sub>450</sub> was used to estimate cell density. In contrast, *S. coelicolor* was cultivated in microtiter  
223 plates, and cell growth was monitored using continuous backscatter measurements. In both  
224 cases, phage titer was measured over time to estimate the production of phage progeny.

225 Infection of *S. venezuelae* with Alderaan and Coruscant showed moderate lysis for MOI  
226 1, and distinct OD drops for the MOI 10, which was reduced to almost zero after 24 h of  
227 infection (Figure 2A). Phage titers showed a significant increase after 16 h of infection and  
228 were markedly higher for MOI 10 than MOI 1.

229 As for the *S. coelicolor* phages (Figure 2B), infection with Dagobah caused a mild  
230 growth delay, visible especially for the highest MOI (MOI 1). In parallel, the phage titers  
231 grew moderately (10<sup>2</sup>-fold increase between 0 and 48 h) or strongly (10<sup>5</sup>-fold increase  
232 between 0 and 48 h) for initially low (MOI 0.05) or high (MOI 1) MOIs, respectively. In  
233 contrast, infection with Endor1 had a profound effect on bacterial growth, as the highest  
234 MOIs (MOI 0.1 and 1) effectively suppressed growth. The phage titers showed concordant  
235 behavior, with a strong increase from 16 hours and a titer plateauing at a high level for MOI  
236 0.1. Endor2 showed an intermediate effect: the growth curves were significantly shifted,  
237 proportionally to the initial MOIs. At low MOIs, the evolution of Endor1/2 titer was bell-  
238 shaped, with an initial increase until 40 hours followed by a decline down to a virtually null  
239 titer at the end of the experiment.

240 Furthermore, the backscatter started to decrease in the uninfected wells starting from  
241 50h, coinciding with the start of the production of blue-pigmented actinorhodin. A similar  
242 drop was also observed in the samples infected with Dagobah, Endor1 and the lowest MOI  
243 of Endor2.

244



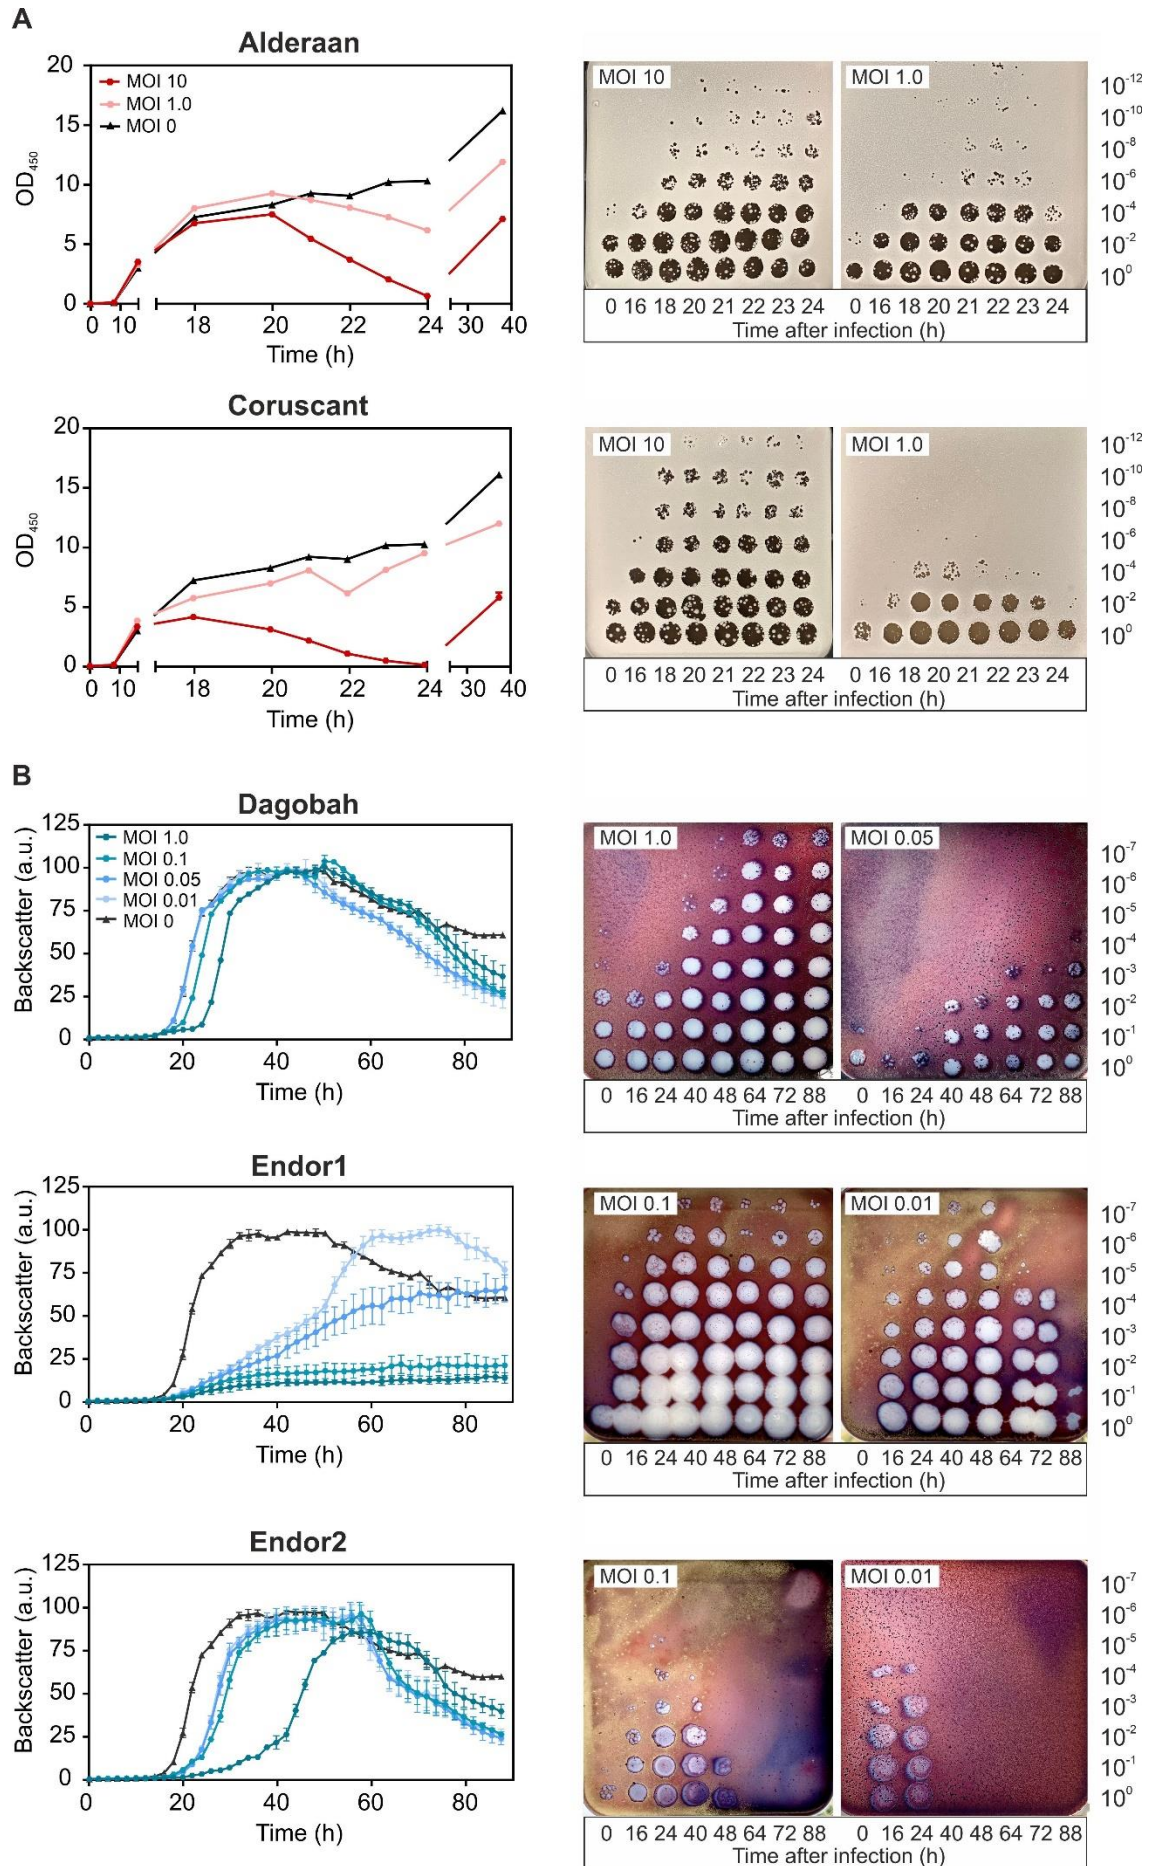

246 **Figure 2. Infection curves of the five phages infecting *S. venezuelae* (a) and *S. coelicolor* (b).** Spores of  
 247 either *S. venezuelae* ( $10^5$ ) or *S. coelicolor* M145 ( $10^6$ ) were grown in GYM or YEME medium, respectively.  
 248 After 6 to 8 hours, phages were added at the corresponding multiplicity of infection (MOI). OD<sub>450</sub> or backscatter  
 249 were measured over time (left panels), in parallel to phage titers (right panels).

250

251 **Table 1.** The host range of the five phages was assessed by spotting serial dilutions of these phages on lawns of  
 252 different *Streptomyces* species propagated on GYM medium. The outcome of the spot assays is reported as  
 253 follows: hosts used for phage isolation (grey), plaque formation (green), clearance of the bacterial lawn without  
 254 visible plaques (yellow).

|                                         | <b>Alderaan</b> | <b>Coruscant</b> | <b>Dagobah</b> | <b>Endor1</b> | <b>Endor2</b> |
|-----------------------------------------|-----------------|------------------|----------------|---------------|---------------|
| <i>S. venezuelae</i>                    |                 |                  |                |               |               |
| <i>S. coelicolor</i> M600               |                 |                  |                |               |               |
| <i>S. coelicolor</i> M145               |                 |                  |                |               |               |
| <i>S. rimosus</i> subsp. <i>rimosus</i> |                 |                  |                |               |               |
| <i>S. scabiei</i>                       |                 |                  |                |               |               |
| <i>S. griseus</i>                       |                 |                  |                |               |               |
| <i>S. platensis</i>                     |                 |                  |                |               |               |
| <i>S. xanthochromogenes</i>             |                 |                  |                |               |               |
| <i>S. lividans</i>                      |                 |                  |                |               |               |
| <i>S. olivaceus</i>                     |                 |                  |                |               |               |
| <i>S. cyaneofuscatus</i>                |                 |                  |                |               |               |

255

256 While phages usually have a relatively narrow host range, some phages can sometimes  
 257 infect many strains of the same species and even distinct species. We assessed the host-range  
 258 of our phages by spotting them on lawns of different *Streptomyces* species (Table 1).

259 Interestingly, Endor1 and Endor2—but not Dagobah—formed plaques on *S. venezuelae*.  
 260 *S. coelicolor* M145 showed the same sensitivity pattern than the M600 strain. M145 and  
 261 M600 are both plasmid-free derivatives of A3(2) and mainly differ from each other in the  
 262 length of their direct terminal repeats [17].

263 Beside *S. venezuelae* and *S. coelicolor*, *S. lividans* showed plaque formation by phage  
 264 Dagobah. Endor1 and Endor2 also formed plaques on *S. olivaceus* and *S. cyanofuscatus*.  
 265 Alderaan, Endor1 and Endor2 caused indefinite clearance of the bacterial lawn of several  
 266 species, but higher dilutions did not reveal distinct, single plaques. For these species, the  
 267 phage lysates could have inhibitory effects on growth or cause non-productive infection [36–  
 268 37]. In summary, Endor1 and Endor2 showed the broadest host range, but overall, the five  
 269 phages we isolated feature a relatively modest host range as they are only able to infect few  
 270 other *Streptomyces* species.

### 271 3.3 Genome sequencing and genome features

272 All phages were sequenced using short-read technology (Illumina Mi-Seq). Each  
 273 genome could be assembled to a single contig, to which >80% of the reads could be mapped  
 274 confirming the purity of the samples.

275 The genome features of the five phages are summed up in Table 2. Briefly, they show  
 276 diverse genome sizes (39 to 133 kb), GC-contents (48 to 72%) and ORFs numbers (51 to



277 290). The phage Coruscant differed from other phages, in that its genome is significantly  
278 larger than the other phages and exhibits a markedly low GC content (48%), in comparison  
279 to the one of its host (72%). The genomic ends were predicted using PhageTerm, which  
280 detects biases in the number of reads to determine DNA termini and phage packaging  
281 mechanisms [29]. Alderaan, Endor1 and Endor2 showed a headful packaging mechanism  
282 where the phage genomes have a fixed start at the *pac* site, but the end of the genome is  
283 variable. In contrast, phages Coruscant and Dagobah have direct terminal repeats (DTR).  
284 These DTR were identified in the initial assembly by an approximately 2-fold increase in  
285 coverage clearly delimited at single base positions. Phage lifecycle was predicted using  
286 PhageAI, which developed a lifecycle classifier based on machine learning and natural  
287 language processing [30].  
288

289 **Table 2. Basic genome features of the five phages.** Open reading frames (ORFs) were predicted using Prokka  
290 [25] and were later manually curated. Protein domains encoded in ORFs were identified using RPS-BLAST  
291 against the Conserved Domain Database (CDD). The type of genome ends was determined using Phage Term  
292 [29]. The lifestyle of each phage was predicted by the machine-learning based program PhageAI [30].

| Phage name | Accession number | Reference host                            | Genome size (kb) | GC content (%) | ORF number | Genome termini class   | Lifestyle prediction |
|------------|------------------|-------------------------------------------|------------------|----------------|------------|------------------------|----------------------|
| Alderaan   | MT711975         | <i>Streptomyces venezuelae</i> ATCC 10712 | 39               | 72.1           | 51         | Headful ( <i>pac</i> ) | Temperate            |
| Coruscant  | MT711976         | <i>Streptomyces venezuelae</i> ATCC 10712 | 133 (12kb DTR)   | 48.4           | 290        | DTR (long)             | Virulent             |
| Dagobah    | MT711977         | <i>Streptomyces coelicolor</i> M600       | 47 kb (1kb DTR)  | 68.9           | 93         | DTR (short)            | Temperate            |
| Endor1     | MT711978         | <i>Streptomyces coelicolor</i> M600       | 49               | 65.8           | 75         | Headful ( <i>pac</i> ) | Temperate            |
| Endor2     | MT711979         | <i>Streptomyces coelicolor</i> M600       | 48               | 65.1           | 75         | Headful ( <i>pac</i> ) | Temperate            |

293

294 Phage genes involved in the same function are usually clustered together, forming  
295 functional modules (Figure 3) [38–39]. These modules fulfil the basic functions necessary  
296 for production of progeny phages, including DNA/RNA metabolism, DNA replication and  
297 repair, DNA packaging, virion structure and assembly (tail and capsid), regulation, lysogeny  
298 (in the case of temperate phages) and lysis.

299 Interestingly, Coruscant's large genomes is paralleled by a high genome complexity. It  
300 contains no less than 41 copies of tRNAs, covering 19 different amino acids - all standard  
301 amino acids except valine. Coruscant has also a relatively high fraction of coding sequences  
302 for which no function could be predicted (155 hypothetical proteins out 290 CDS compared  
303 to 16/51 for Alderaan).

304 The phages were also found to encode homologs of bacterial regulators that are typically  
305 used by *Streptomyces* to control sporulation and overall development. For example, *whiB*  
306 (found in Alderaan, and Coruscant) and *ssgA* (found in Dagobah) are both essential for  
307 sporulation of *Streptomyces* [40–41]. Three phages (Coruscant, Endor1 and Endor2) also

308 encode Lsr2-like proteins, which are nucleoid-associated proteins functioning as xenogeneic  
309 silencing proteins and are conserved throughout Actinobacteria [42].

310

Functional classes

■ DNA/RNA metabolism ■ DNA replication and repair ■ regulation ■ lysogeny ■ DNA packaging ■ virion structure and assembly ■ lysis ■ other function ■ hypothetical protein

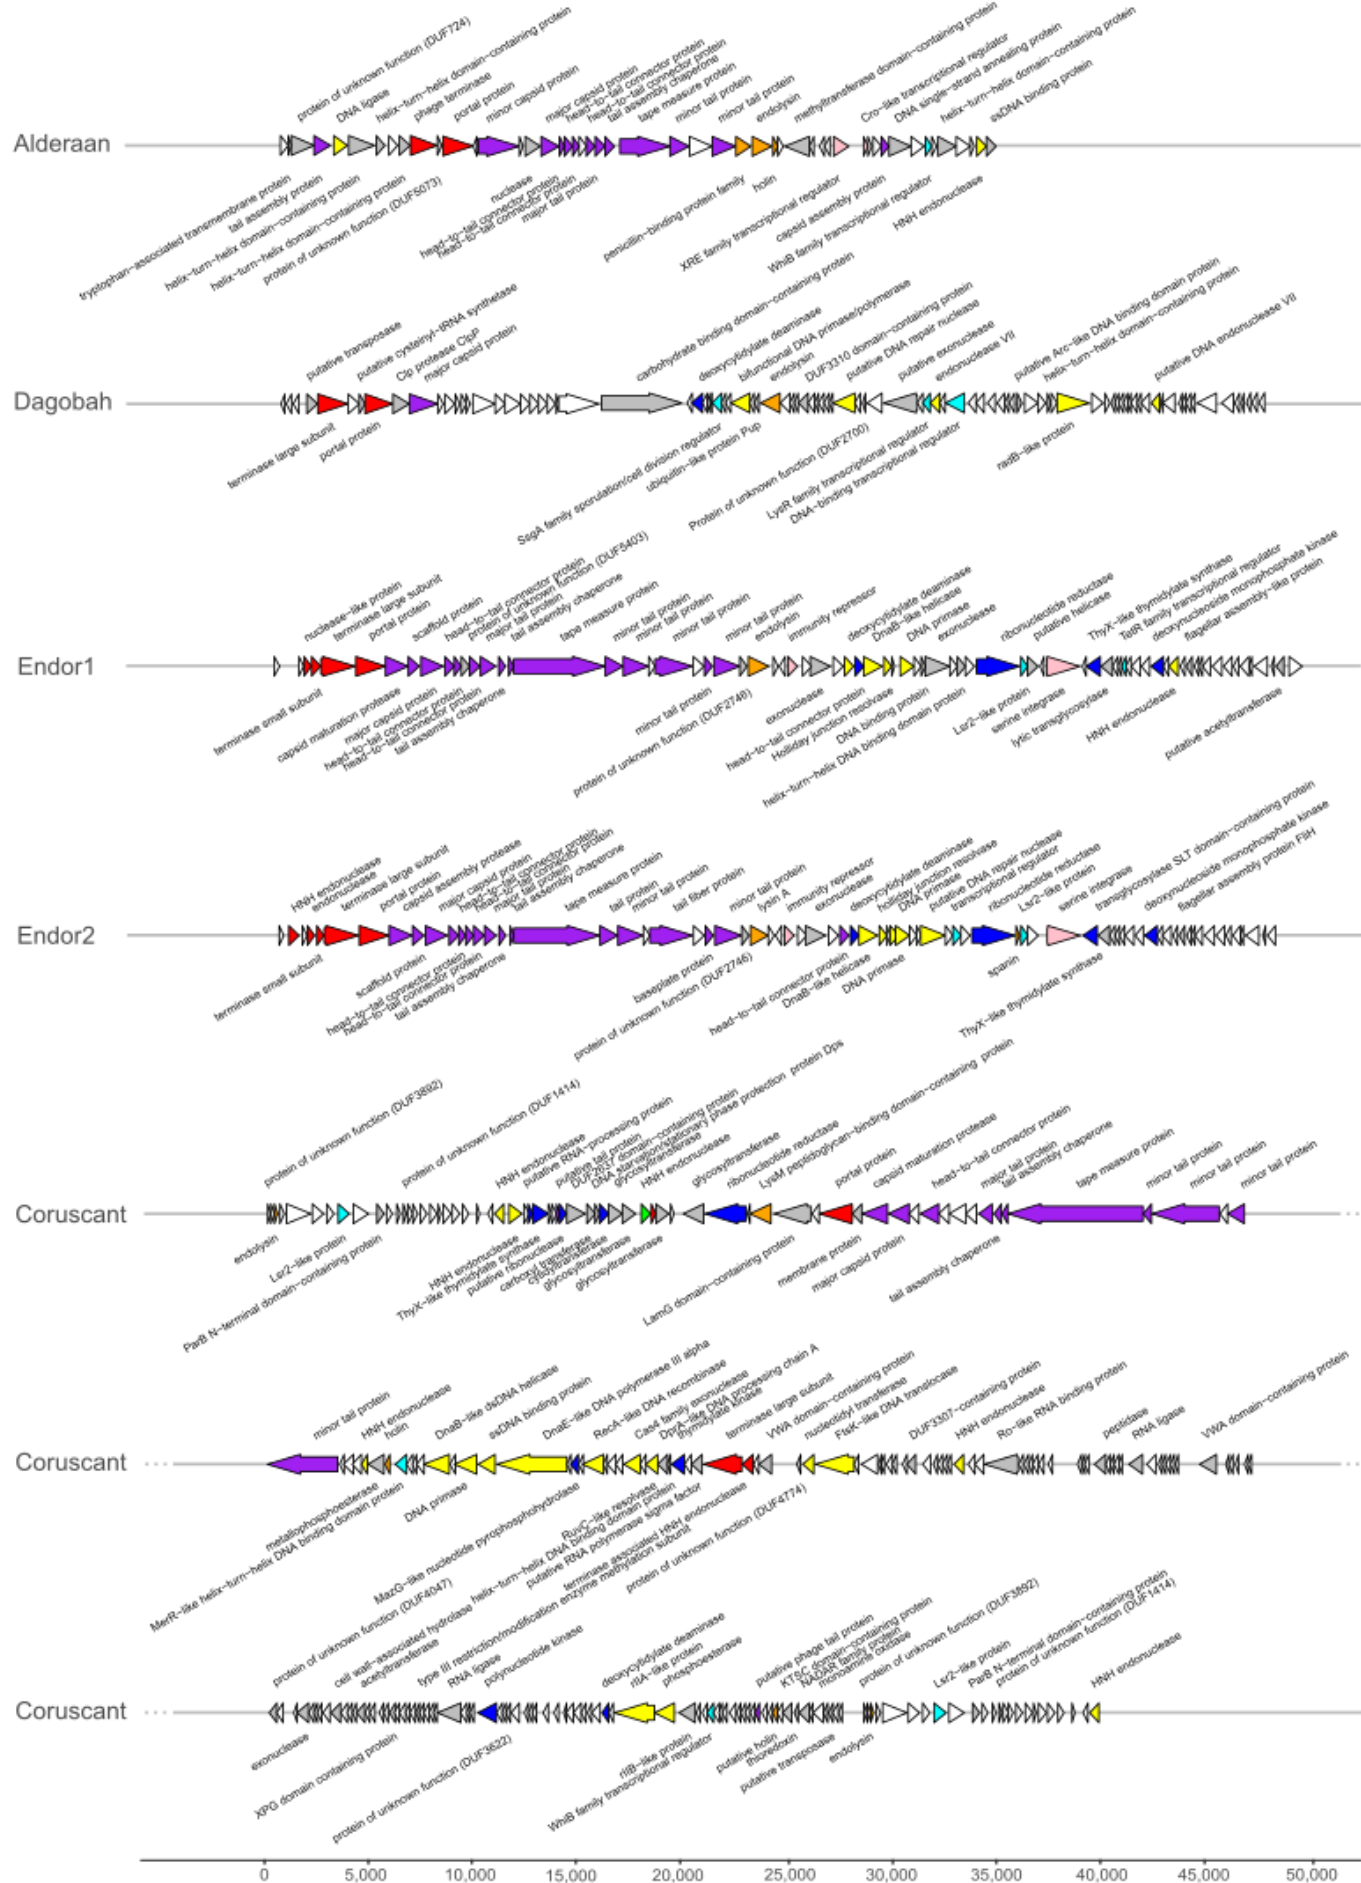



312 **Figure 3. Genome map of the five Streptomyces phages.** Open reading frames (ORFs) were identified with  
 313 Prodigal and functionally annotated using an automatic pipeline based on Prokka [25]. The functional annotation  
 314 was automatically improved and curated using hidden Markov models (HMMs), and Blastp searches [26]  
 315 against different databases (Prokaryotic Virus Orthologous Groups (pVOGs) [27], viral proteins and Conserved  
 316 Domain Database (CDD)) [28]. Genome maps were created using the R package gggenes.

317 **3.4 Average nucleotide identity (ANI) analysis**

318 We established the sequence relationship between the newly sequenced *Streptomyces*  
 319 phages and the selected genomes from the representative group members of actinophages.  
 320 The Average nucleotide identity (ANI) based clustering dendrogram analysis showed four  
 321 (Endor1, Endor2, Alderaan, and Coruscant) out of five phage genomes clustered confidently  
 322 with the members of already known clusters (Endor1/Endor2: BD, Coruscant: BE, and  
 323 Alderaan: BC) (Figure 4). However, one of the phage genomes (Dagobah) does not share  
 324 sufficient similarity and was therefore clustered as an unresolved group. As expected, the  
 325 overall analysis showed that except Dagobah, all four phages show close relatedness to  
 326 *Streptomyces* phages.

327

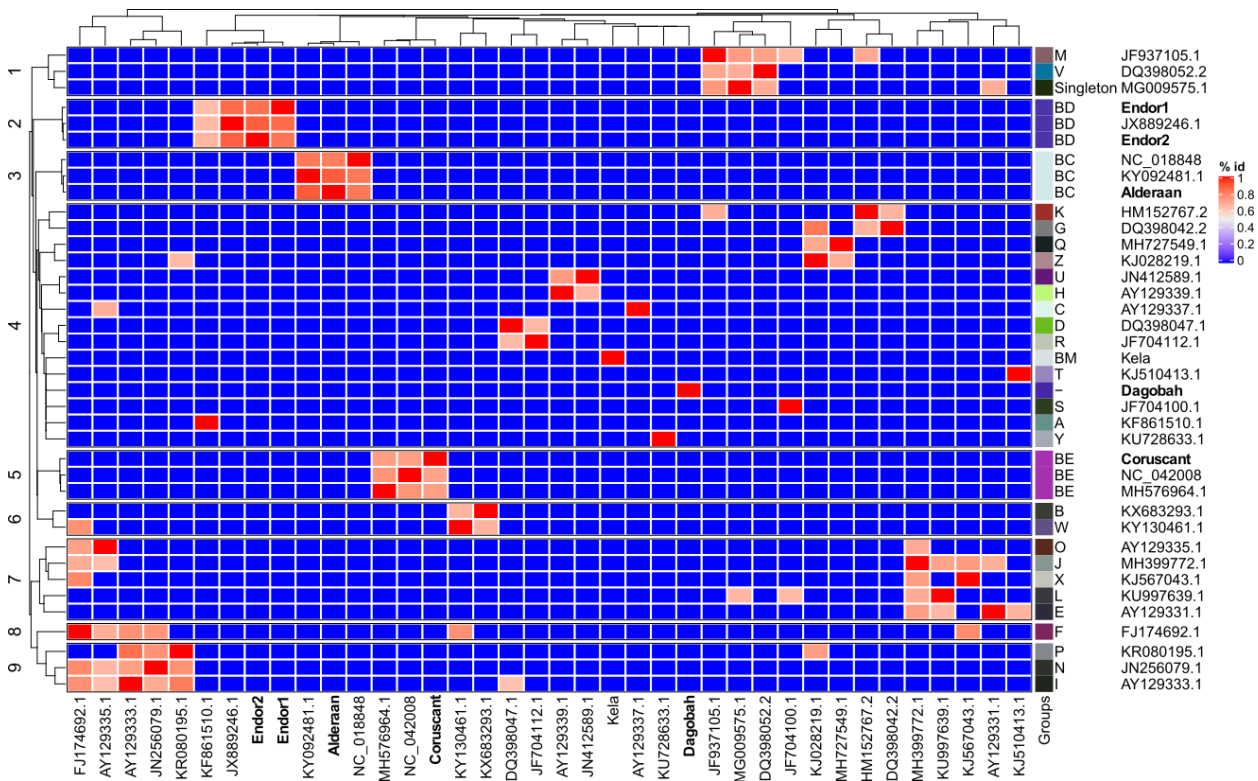

328

329 **Figure 4. Average nucleotide-based dendrogram analysis using 38 actinophage genomes.** These 38  
 330 genomes include 31 genomes downloaded from the Actinophage Database (<https://phagesdb.org/>), two genomes  
 331 from NCBI based on close relatedness, and the five newly sequenced phages. The group of each phage, as  
 332 defined by the Actinophage Database, is indicated.

333

334

335 **3.5 Protein domain-based analysis**

336 Sequence relationship between the phage genomes is most commonly determined with  
 337 the help of genome-wide similarity or average nucleotide identity-based analysis. However,

338 a traditional method such as phylogeny with single genes is challenging because of the high  
339 variability and lack of universal genes across the phage genomes. Thus, we used additional  
340 phyletic-based analysis to establish a sequence relationship between the phage genomes. The  
341 hierarchical clustering dendrogram based on the identified 703 Pfam domains presence-  
342 absence matrix confidently clusters newly sequenced phages with known actinophages  
343 (Figure 5). In comparison to ANI-based analysis, hierarchical clustering showed congruent  
344 topology for the four newly sequenced *Streptomyces* phage genomes (Endor1 and Endor2:  
345 BD cluster, Alderaan: BC cluster, and Coruscant: BE cluster) (Supplementary Figures S2-  
346 S5). It also resolved polytomy between the unresolved groups and showed that Dagobah  
347 comes under the singleton group, consisting of highly divergent phages. Moreover, a high  
348 level of congruence was observed between already known groups and the groups identified  
349 by our hierarchical clustering. Thus, our results strongly suggest domain-based phyletic or  
350 hierarchical clustering analysis as an alternate way of classification of newly sequenced  
351 phage genomes.  
352

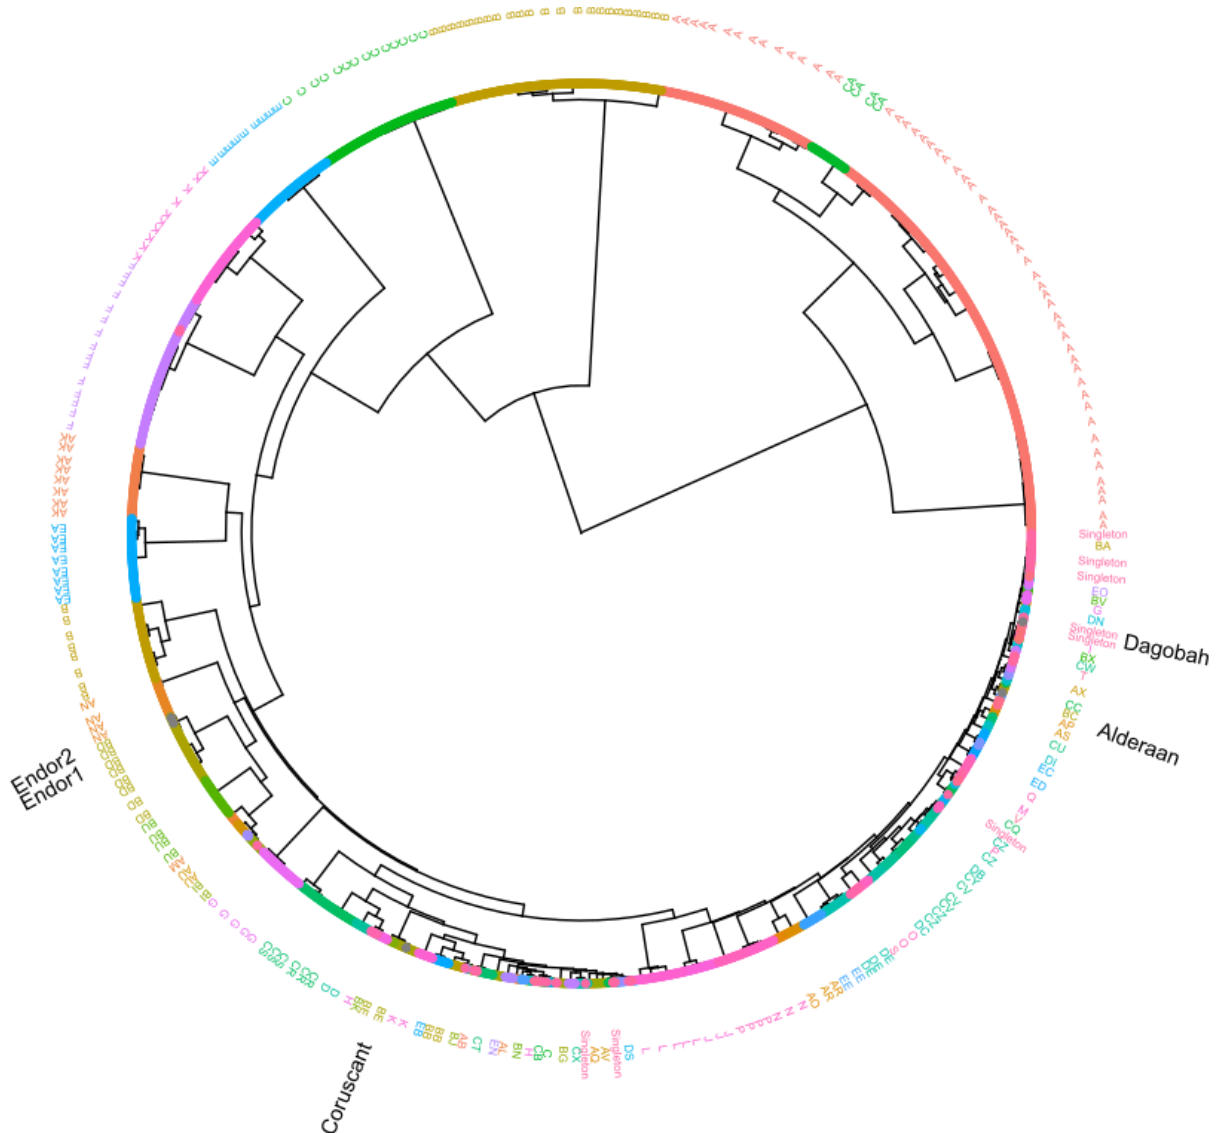

353

354 **Figure 5. Protein domain-based hierarchical clustering.** The dendrogram was constructed based on the  
355 presence-absence matrix of the > 700 Pfam protein domains identified from 2486 actinophage genomes. Phages  
356 are color-coded according to known groups from the Actinobacteriophage Database (<https://phagesdb.org/>) [31].  
357 The position of the five new phage genomes is indicated as black text.

358

359  
360  
361

#### 362 4. Discussion

363 In this study, we report the isolation and characterization of five novel *Streptomyces*  
364 phages. Alderaan and Coruscant were isolated using *S. venezueale*, while *S. coelicolor* was  
365 the host used for isolation of Dagobah, Endor1 and Endor2.

366 Four for of them (Alderaan, Dagobah, Endor1 and Endor2) were predicted to be  
367 temperate phages. In contrast, Coruscant was predicted to feature a lytic lifestyle, and exhibits  
368 a large genome (superior to 130 kb) with a low GC content (48%), in comparison to the 72%  
369 of its *Streptomyces* host. Coruscant also encodes 41 copies of tRNA genes, spanning 19 of  
370 the 20 standard amino acids. This large tRNA gene repertoire could be used to optimize gene  
371 expression in hosts that have differing codon usage patterns or to counteract potential tRNA-  
372 based degradation defense systems [43]. Altogether, the combination of a low GC content  
373 and a substantial tRNA equipment suggests a recent adaptation of the phage Coruscant to  
374 *Streptomyces*.

375 ANI and hierarchical clustering analysis revealed that Alderaan, Coruscant and  
376 Endor1/Endor2 belong to clusters BC, BE and BD defined by PhagesDB [31], respectively.  
377 In contrast, Dagobah showed very little homology with described phages, and was thus  
378 considered as a singleton. This finding highlights the largely untapped phage diversity,  
379 making the isolation of entirely “novel” phages still possible.

380 *Streptomyces* are characterized by their complex lifestyle and cellular differentiation.  
381 Interestingly, the isolated actinophages also encode homologs of SsgA, WhiB and Lsr2  
382 proteins—regulatory proteins typically encoded by their hosts. The *ssgA* gene product was  
383 previously shown to be necessary for proper sporulation of *Streptomyces coelicolor* [41];  
384 *whiB* is also essential for sporulation of *Streptomyces* and was already reported to be found  
385 in several actinophages [44-46]. Interestingly, the WhiB-like protein of mycobacteriophage  
386 TM4, WhiB<sub>TM4</sub>, was shown to inhibit the transcription of Mycobacterium *whiB2*. Expression  
387 of WhiB<sub>TM4</sub> in *M. smegmatis* led to hindered septation resembling a WhiB2 knockout  
388 phenotype, highlighting how phage can interfere with their host’s development [45].

389 Lsr2-like proteins are nucleoproteins conserved in actinobacteria. In *Streptomyces*, they  
390 were recently shown to silence cryptic specialized metabolic clusters [47]. The first example  
391 of a phage-encoded Lsr2-like protein is the prophage-encoded Lsr2-like protein CgpS in  
392 *Corynebacterium glutamicum*. CgpS was shown to maintain the lysogenic state of the  
393 prophage on which it resides. Further bioinformatic searches revealed that Lsr2-like proteins  
394 are abundant in actinophages, with almost 20% of *Streptomyces* phages encoding such  
395 proteins [42]. However, their role in the coordination of the phage life cycle remains still  
396 unclear. Altogether, these observations suggest that phages manipulate their host  
397 development, by interfering with central processes such as sporulation and antibiotic  
398 production.

399 More generally, the specificities of *Streptomyces* – especially its morphological  
400 complexity – impact the phage isolation and characterization process. For example, the  
401 mycelial nature of streptomycetes complicates quantitative studies. The notion of MOI loses  
402 a lot of its significance once mycelium has formed, as the network structure originating from  
403 one spore has greatly increased phage adsorption but would still be counted as one CFU  
404 [14,48]. Furthermore, the formation of clumps, although mitigated by the addition of glass  
405 beads or increase of osmotic pressure [49], makes accurate monitoring of cell growth (based  
406 on optical density or backscatter) difficult.

407 *S. coelicolor* was established as a model system for the *Streptomyces* genus partly  
408 because of its prolific pigment production [50]. Interestingly, we observed colored halos



409 around the plaques formed by the *S. coelicolor* phages. Exposure to ammonia fume  
410 confirmed that these colored halos contain actinorhodin. This observation suggests that  
411 *Streptomyces* release metabolites in reaction to phage predation, some of which may  
412 potentially have anti-phage properties as it was shown recently with anthracyclines in  
413 *Streptomyces peucetius* [51].

414 Understanding the processes governing phage infection has the potential to illuminate  
415 the basic physiology of their hosts. Therefore, phages can serve as a basis to study  
416 *Streptomyces*' specific traits—its complex reproduction cycle and abundant production of  
417 secondary metabolites—in the context of phage infection.

418

419

420 **Supplementary Materials:**

421 Figure S1: Close-ups of phage plaques imaged using a Nikon SMZ18 stereomicroscope,  
422 before (upper row) and after (lower row) exposure to ammonia fumes.

423 Figure S2: Subclade dendrogram with *Streptomyces* phage Alderaan and its closely related  
424 actinophages.

425 Figure S3: Subclade dendrogram with *Streptomyces* phage Coruscant and its closely related  
426 actinophages.

427 Figure S4: Subclade dendrogram with *Streptomyces* phage Dagobah and its closely related  
428 actinophages.

429 Figure S5: Subclade dendrogram with *Streptomyces* phages Endor1 and Endor2 and their  
430 closely related actinophages

431

432 Supplementary Table 1: List of the functional annotation of proteins ORFs within phage  
433 genomes

434

435 **Author Contributions:** Conceptualization, A.H., and J.F.; methodology, All; validation,  
436 All; formal analysis, All; investigation, A.H. and L.K.; resources, V.S. and J.F.; data curation,  
437 A.H. and V.S.; writing—original draft preparation, A.H. and V.S.; writing—review and  
438 editing, All; visualization, A.H., V.S. and L.K.; supervision, J.F.; project administration, J.F.;  
439 funding acquisition, J.F. All authors have read and agreed to the published version of the  
440 manuscript

441

442 **Funding:** We thank the European Research Council (ERC Starting Grant, grant number  
443 757563) for financial support. A. H. was supported by a fellowship from the Ecole Normale  
444 Supérieure (Paris, France).

445

446 **Acknowledgments:** We thank David Brandt (Center for Biotechnology, University of  
447 Bielefeld) for his help with genome assembly and Julio Ortiz (Forschungszentrum Jülich) for  
448 his assistance during electron microscopy. The *S. cyaneofuscatus* and *S. olivaceus* strains  
449 were kindly provided by the German Collection of Microorganisms and Cell Cultures  
450 (DSMZ). We are also grateful to the entire Frunzke lab for fruitful discussions.

451

452 **Conflicts of Interest:** The authors declare no conflict of interest.

453

## 454 References

- 455 1. M. J. Bibb, « Understanding and manipulating antibiotic production in actinomycetes », *Biochem Soc Trans*, vol. 41,  
456 n° 6, p. 1355-1364, 2013, doi: 10.1042/BST20130214.
- 457 2. D. A. Hopwood, *Streptomyces in Nature and Medicine: The Antibiotic Makers*. Oxford, New York: Oxford University  
458 Press, 2007.
- 459 3. T. Keiser, M. J. Bibb, M. J. Buttner, K. F. Chater, et D. A. Hopwood, *Practical Streptomyces Genetics*. Norwich: The  
460 John Innes Foundation, 2000.
- 461 4. M. A. Elliot, M. J. Buttner, J. R. Nodwell, « 24 Multicellular Development in *Streptomyces* », *Myxobacteria*, p.  
462 419-438, 2008, doi: 10.1128/9781555815677.ch24.
- 463 5. J. R. McCormick, K. Flärdh, « Signals and regulators that govern *Streptomyces* development », *FEMS Microbiol Rev*,  
464 vol. 36, n° 1, p. 206-231, 2012, doi: 10.1111/j.1574-6976.2011.00317.x.
- 465 6. J. Anne, W. Wohlleben, H. J. Burkardt, R. Springer, A. Pohler, « Morphological and Molecular Characterization of  
466 Several Actinophages Isolated from Soil Which Lyse *Streptomyces cattleya* or *S. venezuelae* », *Microbiology*, vol.  
467 130, n° 10, p. 2639-2649, 1984, doi: 10.1099/00221287-130-10-2639.
- 468 7. S. Donadio, R. Paladino, I. Costanzi, P. Sparapani, W. Schreil, M. Iaccarino, « Characterization of bacteriophages  
469 infecting *Streptomyces erythreus* and properties of phage-resistant mutants. », *J Bacteriol*, vol. 166, n° 3, p.  
470 1055-1060, 1986.
- 471 8. J. E. Dowding, « Characterization of a Bacteriophage Virulent for *Streptomyces coelicolor* A3 (2) | Microbiology  
472 Society », *Journal of General Microbiology*, vol. 76, p. 163-176, 1973.
- 473 9. N. D. Lomovskaya, N. M. Mkrtumian, N. L. Gostimskaya, V. N. Danilenko, « Characterization of Temperate  
474 Actinophage  $\phi$ C31 Isolated from *Streptomyces coelicolor* A3(2) », *J. VIROL.*, vol. 9, p. 5, 1972.
- 475 10. M. C. M. Smith, R. N. Burns, S. E. Wilson, M. A. Gregory, « The complete genome sequence of the *Streptomyces*  
476 temperate phage  $\phi$ C31: evolutionary relationships to other viruses », *Nucleic Acids Res*, vol. 27, n° 10, p. 2145-2155,  
477 1999, doi: 10.1093/nar/27.10.2145.
- 478 11. M. C. M. Smith *et al.*, « Evolutionary Relationships among Actinophages and a Putative Adaptation for Growth in  
479 *Streptomyces* spp. », *Journal of Bacteriology*, vol. 195, n° 21, p. 4924-4935, 2013, doi: 10.1128/JB.00618-13.
- 480 12. J. Burke, D. Schneider, J. Westpheling, « Generalized transduction in *Streptomyces coelicolor* », *PNAS*, vol. 98, n°  
481 11, p. 6289-6294, 2001, doi: 10.1073/pnas.101589398.
- 482 13. N. D. Lomovskaya, K. F. Chater, N. M. Mkrtumian, « Genetics and molecular biology of *Streptomyces*  
483 bacteriophages. », *Microbiology and Molecular Biology Reviews*, vol. 44, n° 2, p. 206-229, 1980.
- 484 14. A. Rosner, R. Gustein, « Adsorption of actinophage Pal 6 to developing mycelium of *Streptomyces* », 1980.
- 485 15. T. C. Jordan *et al.*, « A Broadly Implementable Research Course in Phage Discovery and Genomics for First-Year  
486 Undergraduate Students », *mBio*, vol. 5, n° 1, 2014, doi: 10.1128/mBio.01051-13.
- 487 16. S. T. Pullan, G. Chandra, M. J. Bibb, M. Merrick, « Genome-wide analysis of the role of GlnR in *Streptomyces*  
488 *venezuelae* provides new insights into global nitrogen regulation in actinomycetes », *BMC Genomics*, vol. 12, p. 175,  
489 2011, doi: 10.1186/1471-2164-12-175.
- 490 17. D. Weaver *et al.*, « Genome plasticity in *Streptomyces*: identification of 1 Mb TIRs in the *S. coelicolor* A3(2)  
491 chromosome: Identification of 1 Mb TIRs in *S. coelicolor* A3(2) », *Molecular Microbiology*, vol. 51, n° 6, p.  
492 1535-1550, 2004, doi: 10.1111/j.1365-2958.2003.03920.x.
- 493 18. S. D. Bentley *et al.*, « Complete genome sequence of the model actinomycete *Streptomyces coelicolor* A3(2) »,  
494 *Nature*, vol. 417, n° 6885, p. 141-147, 2002, doi: 10.1038/417141a.
- 495 19. M. D. Shepherd, M. K. Kharel, M. A. Bosserman, J. Rohr, « Laboratory Maintenance of *Streptomyces* species », *Curr*  
496 *Protoc Microbiol*, vol. CHAPTER, p. Unit-10E.1, 2010, doi: 10.1002/9780471729259.mc10e01s18.
- 497 20. K. M. Kauffman M. F. Polz, « Streamlining standard bacteriophage methods for higher throughput », *MethodsX*, vol.  
498 5, p. 159-172, 2018, doi: 10.1016/j.mex.2018.01.007.
- 499 21. F. Kensy, E. Zang, C. Faulhammer, R.-K. Tan, J. Büchs, « Validation of a high-throughput fermentation system based  
500 on online monitoring of biomass and fluorescence in continuously shaken microtiter plates », *Microb. Cell Fact.*, vol.  
501 8, p. 31, 2009, doi: 10.1186/1475-2859-8-31.
- 502 22. C. Rückert *et al.*, « Complete genome sequence of *Streptomyces lividans* TK24 », *J. Biotechnol.*, vol. 199, p. 21-22,  
503 2015, doi: 10.1016/j.jbiotec.2015.02.004.
- 504 23. D. Gordon P. Green, « Consed: a graphical editor for next-generation sequencing », *Bioinformatics*, vol. 29, n° 22, p.  
505 2936-2937, 2013, doi: 10.1093/bioinformatics/btt515.



- 506 24. D. Hyatt, G.-L. Chen, P. F. LoCascio, M. L. Land, F. W. Larimer, L. J. Hauser, « Prodigal: prokaryotic gene  
507 recognition and translation initiation site identification », *BMC Bioinformatics*, vol. 11, n° 1, p. 119, 2010, doi:  
508 10.1186/1471-2105-11-119.
- 509 25. T. Seemann, « Prokka: rapid prokaryotic genome annotation », *Bioinformatics*, vol. 30, n° 14, p. 2068-2069, 2014,  
510 doi: 10.1093/bioinformatics/btu153.
- 511 26. S. F. Altschul, W. Gish, W. Miller, E. W. Myers, D. J. Lipman, « Basic local alignment search tool », *Journal of*  
512 *Molecular Biology*, vol. 215, n° 3, p. 403-410, 1990, doi: 10.1016/S0022-2836(05)80360-2.
- 513 27. A. L. Grazziotin, E. V. Koonin, D. M. Kristensen, « Prokaryotic Virus Orthologous Groups (pVOGs): a resource for  
514 comparative genomics and protein family annotation », *Nucleic Acids Res*, vol. 45, n° D1, p. D491-D498, 2017, doi:  
515 10.1093/nar/gkw975.
- 516 28. A. Marchler-Bauer *et al.*, « CDD: NCBI's conserved domain database », *Nucleic Acids Res*, vol. 43, n° D1, p.  
517 D222-D226, 2015, doi: 10.1093/nar/gku1221.
- 518 29. J. R. Garneau, F. Depardieu, L.-C. Fortier, D. Bikard, M. Monot, « PhageTerm: a tool for fast and accurate  
519 determination of phage termini and packaging mechanism using next-generation sequencing data », *Scientific Reports*,  
520 vol. 7, n° 1, p. 8292, 2017, doi: 10.1038/s41598-017-07910-5.
- 521 30. P. Tynecki, A. Guziński, J. Kazimierzczak, M. Jadczyk, J. Dastyk, A. Onisko, « PhageAI - Bacteriophage Life Cycle  
522 Recognition with Machine Learning and Natural Language Processing », *Bioinformatics*, preprint, 2020. doi:  
523 10.1101/2020.07.11.198606.
- 524 31. D. A. Russell G. F. Hatfull, « PhagesDB: the actinobacteriophage database », *Bioinformatics*, vol. 33, n° 5, p. 784-786,  
525 2017, doi: 10.1093/bioinformatics/btw711.
- 526 32. L. Pritchard, *widowquinn/pyani*. 2020.
- 527 33. Z. Gu, R. Eils, M. Schlesner, « Complex heatmaps reveal patterns and correlations in multidimensional genomic  
528 data », *Bioinformatics*, vol. 32, n° 18, p. 2847-2849, 2016, doi: 10.1093/bioinformatics/btw313.
- 529 34. G. Yu, D. K. Smith, H. Zhu, Y. Guan, T. T.-Y. Lam, « ggtree: an r package for visualization and annotation of  
530 phylogenetic trees with their covariates and other associated data », *Methods in Ecology and Evolution*, vol. 8, n° 1,  
531 p. 28-36, 2017, doi: 10.1111/2041-210X.12628.
- 532 35. B. A. M. Rudd, D. A. Hopwood, « Genetics of Actinorhodin Biosynthesis by *Streptomyces coelicolor* A3(2) », *Microbiology*,  
533 vol. 114, n° 1, p. 35-43, 1979, doi: 10.1099/00221287-114-1-35.
- 534 36. S. T. Abedon, « Lysis from without », *Bacteriophage*, vol. 1, n° 1, p. 46-49, 2011, doi: 10.4161/bact.1.1.13980.
- 535 37. S. T. Abedon, « Detection of Bacteriophages: Phage Plaques », in *Bacteriophages: Biology, Technology, Therapy*, D.  
536 R. Harper, S. T. Abedon, B. H. Burrowes, M. L. McConville, Éd. Cham: Springer International Publishing, 2018, p.  
537 1-32.
- 538 38. D. Botstein, « A Theory of Modular Evolution for Bacteriophages\* », *Annals of the New York Academy of Sciences*,  
539 vol. 354, n° 1, p. 484-491, 1980, doi: 10.1111/j.1749-6632.1980.tb27987.x.
- 540 39. H. Brüßow, F. Desiere, « Comparative phage genomics and the evolution of *Siphoviridae*: insights from dairy  
541 phages », *Molecular Microbiology*, vol. 39, n° 2, p. 213-223, 2001, doi: 10.1046/j.1365-2958.2001.02228.x.
- 542 40. V. Molle, W. J. Palframan, K. C. Findlay, M. J. Buttner, « WhiD and WhiB, homologous proteins required for  
543 different stages of sporulation in *Streptomyces coelicolor* A3(2) », *J. Bacteriol.*, vol. 182, n° 5, p. 1286-1295, 2000,  
544 doi: 10.1128/jb.182.5.1286-1295.2000.
- 545 41. G. P. van Wezel, J. van der Meulen, S. Kawamoto, R. G. M. Luiten, H. K. Koerten, B. Kraal, « *ssgA* Is Essential for  
546 Sporulation of *Streptomyces coelicolor* A3(2) and Affects Hyphal Development by Stimulating Septum Formation », *Journal of Bacteriology*,  
547 vol. 182, n° 20, p. 5653-5662, 2000, doi: 10.1128/JB.182.20.5653-5662.2000.
- 548 42. E. Pfeifer, M. Hünnefeld, O. Popa, J. Frunzke, « Impact of Xenogeneic Silencing on Phage-Host Interactions », *Journal of Molecular Biology*,  
549 2019, doi: 10.1016/j.jmb.2019.02.011.
- 550 43. P. Hyman, S. T. Abedon, « Chapter 7 - Bacteriophage Host Range and Bacterial Resistance », in *Advances in Applied*  
551 *Microbiology*, vol. 70, Academic Press, 2010, p. 217-248.
- 552 44. P. Morris, L. J. Marinelli, D. Jacobs-Sera, R. W. Hendrix, G. F. Hatfull, « Genomic Characterization of  
553 Mycobacteriophage Giles: Evidence for Phage Acquisition of Host DNA by Illegitimate Recombination », *J*  
554 *Bacteriol.*, vol. 190, n° 6, p. 2172-2182, 2008, doi: 10.1128/JB.01657-07.
- 555 45. J. Rybniker *et al.*, « Insights into the function of the WhiB-like protein of mycobacteriophage TM4--a transcriptional  
556 inhibitor of WhiB2 », *Mol. Microbiol.*, vol. 77, n° 3, p. 642-657, 2010, doi: 10.1111/j.1365-2958.2010.07235.x.
- 557 46. W. Van Dessel *et al.*, « Complete genomic nucleotide sequence and analysis of the temperate bacteriophage VWB », *Virology*,  
558 vol. 331, n° 2, p. 325-337, 2005, doi: 10.1016/j.virol.2004.10.028.
- 559 47. E. J. Gehrke *et al.*, « Silencing cryptic specialized metabolism in *Streptomyces* by the nucleoid-associated protein  
560 Lsr2 », *eLife*, vol. 8, p. e47691, 2019, doi: 10.7554/eLife.47691.

- 561 48. C. M. Gilmour, E. C. Noller, B. Watkins, « STUDIES ON *STREPTOMYCES* PHAGE: I. Growth Characteristics of  
562 the *Streptomyces griseus* Host-Phage System », *Journal of Bacteriology*, vol. 78, n° 2, p. 186-192, 1959.
- 563 49. L. D. Nguyen *et al.*, « Cultivation System Using Glass Beads Immersed in Liquid Medium Facilitates Studies of  
564 *Streptomyces* Differentiation », *Appl. Environ. Microbiol.*, vol. 71, n° 6, p. 2848-2852, 2005, doi:  
565 10.1128/AEM.71.6.2848-2852.2005.
- 566 50. K. Chater, « David Hopwood and the emergence of *Streptomyces* genetics », *Int. Microbiol.*, vol. 2, n° 2, p. 61-68,  
567 1999.
- 568 51. S. Kronheim *et al.*, « A chemical defence against phage infection », *Nature*, vol. 564, n° 7735, p. 283, 2018, doi:  
569 10.1038/s41586-018-0767-x.

570
